1  
2  
3  
4  
5  
6  
7  
8  
9  
10  
11  
12  
13  
14  
15  
16  
17  
18  
19  
20  
21  
22  
23

**STAT6 mRNA and protein knockdown using multiple siRNA  
sequences inhibits proliferation and induces apoptosis of the  
human colon adenocarcinoma cell line, HT-29**

Salguero-Aranda C.<sup>1\*</sup>, Sancho-Mensat D.<sup>1</sup>, Sultan S.<sup>1</sup>, Reginald A.<sup>1</sup>, and Chapman L.<sup>1</sup>

<sup>1</sup> Celixir, Stratford-upon-Avon, United Kingdom.

\* Corresponding author  
carmen.salguero@celixir.com

## 24 **Abstract**

25 The transcription factor STAT6 is strongly expressed in various tumours and is most  
26 highly expressed in malignant lymphomas and pancreatic, colorectal, prostate and  
27 breast cancers. STAT6 expression in colorectal cancer is associated with an  
28 increased malignancy, poor prognosis and poor survival rates. Colorectal cancer has  
29 an incidence of approximately 1,361,000 patients *per annum* worldwide and  
30 approximately 60% of those cancers show STAT6 expression. Techniques aimed at  
31 reducing or blocking STAT6 expression may be useful in treating colorectal cancers.  
32 Celixir's four proprietary STAT6 specific small interfering RNA (siRNA) sequences  
33 were tested *in vitro* using the human colon adenocarcinoma cell line, HT-29. The four  
34 sequences were introduced individually and in combination into HT-29 cells at different  
35 concentrations (10 to 200 nM). Decreases in STAT6 mRNA and protein levels were  
36 analysed to confirm the transfection was successful. STAT6 knockdown effects were  
37 measured by analysing cell proliferation and apoptosis. Results showed that 100nM  
38 siRNA concentration was the most effective and all four individual sequences  
39 knocked-down STAT6 mRNA and protein by more than 50%. Although all individual  
40 sequences were capable of significantly inhibiting cell proliferation, STAT6.1 and  
41 STAT6.4 were the best. STAT6 silencing also significantly induced late and total  
42 apoptotic events. In conclusion, these results demonstrate that STAT6 siRNA  
43 sequences are capable of inhibiting the proliferation, and inducing late apoptosis, of  
44 HT-29 colon cancer cells and, in some instances, halving the number of cancer cells.  
45 These experiments will be repeated using xenografts of STAT6-expressing colon  
46 cancer cells in immunocompromised mice and the STAT6 siRNA sequences will be  
47 tested in other cancers in which STAT6 is expressed. The STAT6 siRNA sequences

48 therefore represent a potential treatment for the most serious colorectal cancers and  
49 a wide variety of STAT6-expressing cancers.

## 50 **Introduction**

51 Colorectal cancer (CRC) represents 10% of cancers worldwide, ranking second in  
52 women and third in men (1). The incidence of CRC is approximately 1.36 million  
53 patients *per annum* worldwide (1). It is, overall, the fourth most common cause of  
54 death by cancer globally and its incidence is rising every year. Although most cases  
55 are detected in Western countries, its incidence is also increasing in developing  
56 countries (1,2). Actual CRC treatments involve a multimodal approach based on  
57 tumour characteristics and patient-related factors. Most CRC patients with metastases  
58 are treated with a combination of chemotherapy and targeted biological drugs but, in  
59 many cases, this is only a palliative approach (3). Therefore, the development of new,  
60 targeted and universal drugs for the treatment of CRC is needed.

61 The Signal Transducer and Activator of Transcription (STAT) family is formed by  
62 seven different transcription factors (STATs 1-4, 5a, 5b and 6). These proteins are  
63 important mediators in cytokine-related signalling and regulate normal cell  
64 differentiation, growth and survival (4). However, several of the STAT genes may be  
65 considered to be oncogenes (5). For example, STAT3 is overexpressed and active in  
66 many types of cancer, and its targeting by specific inhibitors is being deeply  
67 investigated as a potential cancer treatment (6). STAT6 has also been implicated in  
68 cancer. STAT6 is principally activated by two cytokines in the physiologic setting:  
69 interleukin-4 and interleukin-13 (7–11). Once these cytokines bind to their cell surface  
70 receptors, associated Janus Kinases (Jak) are activated and phosphorylate tyrosine  
71 residues on the receptors. Cytoplasmic STAT6 docks onto the phosphorylated

72 receptors allowing the Jaks to phosphorylate the conserved tyrosine-641 on STAT6.  
73 Once phosphorylated, two STAT6 proteins form a homodimer and the homodimer  
74 translocates to the nucleus where it can directly regulate transcription (9). STAT6 has  
75 a well-known role in tumour immunosurveillance, immune function and  
76 lymphomagenesis but has only recently been associated with cancer progression. The  
77 STAT6 pathway has been heavily studied in animal models. STAT6-defective mice  
78 have shown immunity to mammary carcinoma (12) and also spontaneous rejection of  
79 implanted tumours (13). In humans, high levels of STAT6 have been detected in  
80 different cancer types, including glioblastoma, lymphoma, colorectal, prostate,  
81 pancreatic, and breast cancer (14). In addition, different studies have shown how  
82 STAT6 signalling pathway activation may be involved in the development of prostate,  
83 breast and colon carcinoma (11,15–17). Moreover, in CRC, STAT6 is associated with  
84 increased malignancy and poor prognosis, and patients with CRC expressing STAT6  
85 also show poor survival rates (18). The 5-year relative survival rate for patients with  
86 stage IIIC and IV colon cancer is approximately 53% and 11% respectively (19).  
87 Therefore, techniques aimed at reducing STAT6 expression may be useful in treating  
88 those cancers.

89 Gene silencing by double-stranded (ds) RNA-mediated interference (RNAi) was first  
90 described by Craig Mello and his colleagues in 1998 (20), for which they were awarded  
91 the Nobel Prize in 2008. It is a simple and rapid method of silencing gene expression  
92 in a range of organisms by degradation of RNA into small interfering RNAs (siRNAs)  
93 that activate ribonucleases to target homologous messenger RNA (mRNA) (21).  
94 siRNAs occur naturally from different sources (repeat-associated transcripts, viral  
95 RNAs, hairpin RNAs, *etc*) but can also be synthesized chemically and introduced into  
96 the cells. siRNAs are formed by two strands: the guide strand that assembles into a

97 functional siRNA RNA-induced silencing complex (siRISC), which binds to an Ago  
98 protein, and a passenger strand that is discarded and degraded. The siRISC complex  
99 recognizes target RNAs by base pairing with the guide strand, leading to the silencing  
100 of the target gene through one of several mechanisms (22). Due to its superb  
101 specificity and efficiency, siRNA is considered as an important tool for gene-specific  
102 therapeutic activities that target the mRNAs of disease-related genes.  
103 Consequently, the development of nucleotide-based biopharmaceuticals is a  
104 flourishing industry. According to recent reviews, more than 14 siRNA therapeutics  
105 have entered clinical trials in the past decade (23).  
106 In this study, the potential effects of four proprietary STAT6 siRNA sequences,  
107 previously tested for asthma treatment (24), in a colon cancer cell line were examined  
108 to test the hypothesis that knocking-down STAT6 can prevent the proliferation and  
109 survival of CRC cells.

## 110 **Material and Methods**

111 **Cell culture.** Human colon adenocarcinoma cell line HT-29 was acquired from  
112 the European Collection of Authenticated Cell Cultures (ECCAC) (Catalogue Number  
113 91072201, ATCC® HTB-38). HT-29 cells were cultured in McCoy's 5a medium (Sigma  
114 Aldrich) supplemented with 10% fetal bovine serum (FBS) (Sigma Aldrich), 2 mM of  
115 L-Glutamine (Sigma Aldrich), 100 U/ml of penicillin and 100 µg/ml of streptomycin  
116 (Sigma Aldrich) at 37°C and 5% CO<sub>2</sub>. Cells were passaged when 80-90% confluence  
117 was reached, and the media was changed every 2 - 3 days.

118 **siRNA transfection.** Cells were seeded in 6-well and 12-well plates at a  
119 concentration of 15,000 cells/cm<sup>2</sup>. 24 hours post-culture, cells were then transfected

120 with the four siRNA sequences at different final concentrations using DharmaFECT  
121 Transfection Reagent 1 (Dharmacon) or jetPEI (Polyplus) in antibiotic-free media,  
122 following the manufacturer's instructions. jetPEI transfection was developed using a  
123 ratio of reagent:siRNA of 2:1. The senses of the STAT6 siRNA sequences were:  
124 Sequence 1 (STAT6.1): 5' GCAGGAAGAACUCAAGUUUUUUU 3', Sequence 2  
125 (STAT6.2): 5' ACAGUACGUUACUAGCCUUUUUUU 3', Sequence 3 (STAT6.3): 5'  
126 GAAUCAGUCAACGUGUU GUUUUU 3', Sequence 4 (STAT6.4): 5'  
127 AGCACUGGAGAAAUCAUCAUUUU 3'. Sequential transfections were developed  
128 using STAT6.1 and STAT6.4 at 100 nM. Non-targeting siRNA and GAPDH  
129 (Dharmacon) were used as negative and positive controls respectively at 10 to 200  
130 nM, depending on the assay. Media was not changed until the first 48 hours and  
131 antibiotic-free media was always used.

132 **RNA isolation, reverse transcription and q-PCR.** After 24 hours of  
133 transfection, total RNA was isolated using a microRNA Isolation Kit (Qiagen)  
134 according to the manufacturer's instructions directly from the plate. mRNA was then  
135 quantified by Nanodrop 1000-ND and 1 µg of RNA was transcribed into  
136 complementary DNA (cDNA) using SuperScript III Reverse Transcriptase (Invitrogen)  
137 following the manufacturer's instructions. The DNA primers used were Human STAT6  
138 Forward: 5' CTTTCCGGAGCCACTACAAG 3' and reverse 5'  
139 AGGAAGTGGTTGGTCCCTTT 3'; Human GAPDH Forward: 5' -  
140 TGCACCACCAACTGCTTAGC 3' and reverse 5' GGCATGGACTGTGG TCATGAG  
141 3'. The quantitative PCR (qPCR) was performed in a 7900HT Real-time PCR system  
142 (ThermoFisher). The program cycle was: initial denaturation for 5 min at 95°C,  
143 followed by 40 cycles of 15 sec at 95°C and 60 sec at 60°C. A melt curve was added  
144 at the end of the process. The data was analysed by Delta-Delta Ct method.

145 **STAT6 protein detection.** 48 hours post-transfection, cells were harvested  
146 and fixed and permeabilized with Cell Signalling Buffer Set A (Miltenyi) according to  
147 the manufacturer's instructions. In brief, cells were fixed for 10 min at room  
148 temperature (RT) with the Inside Fix Buffer and permeabilized for 30 min at 4°C with  
149 the Permeabilization Buffer pre-cooled at -20°C. Cells were washed twice with  
150 PBS/0.5%BSA and stained with anti-STAT6 APC conjugated antibody (Miltenyi  
151 Biotec, 130-104-030) (20  $\mu$ l/10<sup>6</sup> cells) and anti-GAPDH FITC conjugated antibody  
152 (Millipore, 130-104-030) (2  $\mu$ l/ 10<sup>6</sup> cells) for 30 min in the dark at 4°C. Antibody isotypes  
153 REA Control (I)-FITC (Miltenyi, 130-104-611) and REA Control (I)-APC (Miltenyi, 130-  
154 104-615) were used as controls. The stained cells were washed once and  
155 resuspended finally in 400  $\mu$ L of PBS/0.5%BSA, before analysing them by flow  
156 cytometry (FACSCalibur, BD). Data was analysed using FlowJo software (FlowJo,  
157 BD).

158 **Cell proliferation.** Cells were grown for 3, 6 or 8 days to analyse individual  
159 transfection, and 13 and 15 days for sequential transfection assays. 48 hours post-  
160 transfection the media was replaced, and every 2 days, fresh antibiotic-free media was  
161 added. Cell number has been used as a measure for cell proliferation. Total and dead  
162 cells were counted using a NucleoCounter NC-100 (Chemometec) and live cells were  
163 then calculated.

164 **Apoptosis analysis.** Cells were harvested 7 days after transfection. Cells  
165 were then stained with anti-Annexin V FITC-conjugated antibody (BD Bioscience,  
166 556420) at 20  $\mu$ l/1 X 10<sup>6</sup> cells in Binding Buffer 1X (BD Bioscience), for 15 min RT  
167 protected from light. Cells were finally resuspended in 400  $\mu$ l of Binding Buffer 1X and  
168 100  $\mu$ l of propidium iodide (PI) solution (250 nM) (Sigma-Aldrich) was added to the

169 cells and incubated for 1 min before analysing with the flow cytometer (FACSCalibur,  
170 BD). Data was analysed using FlowJo software (FlowJo, BD).

171 **Statistical analysis.** The statistical analysis was carried out using PRISM  
172 software, by Student's t-distribution of unpaired data, two-tailed, and 95% level of  
173 confidence. Values were compared to the non-targeted condition. Significant values:  
174 \*(p-value <0.05), \*\*(p-value<0.01), \*\*\*(P<0.001), \*\*\*\*(P-value<0.0001).

## 175 **Results**

176 **STAT6 siRNA optimal dose and best sequences.** In order to test  
177 the four proprietary STAT6 siRNA sequences' efficiency, the first step was to  
178 determine the optimal dose. Ascending concentrations of STAT6: 10, 25, 50, 100 and  
179 200 nM were tested twice (2n) for each STAT6 siRNA sequence and both STAT6  
180 mRNA and protein levels were measured. Results illustrated all four sequences  
181 worked efficiently at silencing STAT6 expression. All conditions tested showed  
182 significant changes versus cells treated with non-targeting (NT) siRNA, with the  
183 exception of 10 and 25 nM of STAT6 sequence 2 (STAT6.2) and 10 nM of STAT6  
184 sequence 3 (STAT6.3) at mRNA level. Regarding the expression of the protein, all  
185 conditions showed statistically significant changes, with 100 and 200 nM being the  
186 most effective, achieving an average of more than 60% knockdown for the four  
187 sequences. No significant changes were observed between 100 and 200 nM (S1A  
188 and B Fig). For this reason, 100 nM was established as the STAT6 siRNA optimal  
189 dose and this concentration was used for the remaining assays. To determine the  
190 effects of STAT6 siRNA on HT-29 cell proliferation, cells were transfected with 100  
191 nM of each siRNA sequence and counted at different time points. Results showed that



192 STAT6.2 and STAT6.3 reduced the number of live cells after 8 days in culture by  
193 approximately 20-30%, while STAT6 siRNA sequences 1 (STAT6.1) and 4 (STAT6.1)  
194 achieved a reduction of approximately 50% (S2A and B Fig). The reduction of the total  
195 number of cells when STAT6.1 and STAT6.4 were used was also appreciable under  
196 the inverted microscope (S2C Fig). To demonstrate the efficacy of STAT6.1 and  
197 STAT6.4 when used at 100 nM, more biological replicates were developed and these  
198 clearly demonstrated that STAT6 expression was reduced by approximately 50% at  
199 both mRNA and protein level (Fig 1A and B). Flow cytometer analyses revealed that  
200 STAT6 fluorescence was extremely decreased in STAT6.1 and STAT6.4 transfected  
201 cells (Fig 1C and D). Thereby, 100 nM and STAT6.1 and STAT6.4 were established  
202 to be the optimal dose and best sequences respectively, and they were used for the  
203 subsequent experiments.

204

205 **Fig1. STAT6 siRNA sequences 1 and 4 (STAT6.1 and STAT6.4) powerfully block**  
206 **STAT6 expression.** (A) STAT6 mRNA level measure. The graph represents the mean  
207  $\pm$  SEM of 6 (Control, NT and STAT6.1) or 3 (STAT6.4) independent experiments  
208 obtained by real-time PCR. Results were analysed by  $\Delta\Delta$ Ct method for relative  
209 quantifications. The fold change is represented by the Y axis, and values are  
210 normalized to control cells. (B) STAT6 protein level analysis. The graph represents  
211 the mean of the percentage of STAT6 positive cells  $\pm$  SEM of 6 (Control, NT and  
212 STAT6.1) or 5 (STAT6.4) independent experiments obtained by flow cytometry. (C)  
213 Representative dot plot and (D) histogram of STAT6 protein analysis by flow  
214 cytometry. STAT6 siRNA sequences and non-targeting siRNA were used at 100 nM  
215 as the final concentration. Control cells were non-transfected cells and STAT6 siRNA

216 sequences 1 and 4 and non-targeting siRNA are denoted as STAT6.1, STAT6.4 and  
217 NT, respectively.

218

219 **STAT6 siRNA sequences 1 and 4 (STAT6.1 and STAT6.4) are**

220 **highly efficient in silencing STAT6 expression.** Employing the

221 methods used previously, a number of biological replicates (STAT6.1, n=7 and

222 STAT6.4, n=3) were analysed to analyse cell proliferation post-transfection with 100

223 nM of STAT6.1 and STAT6.4. NT cells had a similar growth pattern to the control cells,

224 and STAT6.1 and STAT6.4 treatments significantly reduced HT-29 cell proliferation.

225 At both 6 and 8 days of culture, approximately 50% of the number of live cells were

226 obtained post-transfection with STAT6.1 and STAT6.4 in comparison with cells

227 transfected with NT (Fig 2). Moreover, an increased concentration of STAT6.1 and

228 STAT6.4 was tested (200 nM), but no significant changes were seen (data not shown).

229 In addition, combinations of two, three and four STAT6 siRNA sequences 1, 2, 3 and

230 4 were also studied. However, there was no improvement in the results obtained (data

231 not shown). These experiments demonstrate that the STAT6 siRNA sequences, and

232 especially STAT6.1 and STAT6.4, are capable of significantly reducing the number of

233 cancer cells *in vitro* in a short period of time.

234

235 **Fig2. STAT6 siRNA sequences 1 and 4 (STAT6.1 and STAT6.4) significantly**

236 **reduce cell proliferation.** (A) Number of live cells measured at day 6 of culture. The

237 graph represents the mean  $\pm$  SEM of 7 (Control, NT and STAT6.1) or 4 (STAT6.4)

238 independent experiments. (B) Number of live cells measured at day 8 of culture. The

239 graph represents the mean  $\pm$  SEM of 8 (Control, NT and STAT6.1) or 5 (STAT6.4)

240 independent experiments. (C) The graph illustrates how cells grew over time and

241 represents the mean  $\pm$  SEM of the independent experiments shown in A and B. The  
242 number of live cells was calculated as detailed in the material and methods using  
243 NucleoCounter NC-100. STAT6 siRNA sequences and non-targeting (NT) siRNA  
244 were used at 100 nM as the final concentration. Non-transfected cells served as  
245 negative controls and STAT6 siRNA sequences 1 and 4 and non-targeting siRNA are  
246 denoted as STAT6.1, STAT6.4 and NT, respectively.

247

248 **STAT6 siRNA sequences induce apoptotic events.** Once  
249 STAT6.1 and STAT6.4 were shown to significantly reduce the number of live cells over  
250 time, the implication that STAT6 also induces apoptosis was tested. After 8 days of  
251 culture, cells were harvested and counterstained with Annexin V and PI. Cells were  
252 then analysed by flow cytometry and the results showed that the percentage of  
253 Annexin V<sup>+</sup>/PI<sup>+</sup> cells was increased in approximately 40% and approximately 50% of  
254 cells, when HT-29 cells were transfected with STAT6.1 and STAT6.4, respectively,  
255 compared to NT (Fig 3A and C). Furthermore, the number of total apoptotic events  
256 (Annexin V<sup>+</sup> cells) was also augmented in both cases (Fig 3B and C). Moreover, 200  
257 nM and a combination of STAT6 siRNA sequences were also tested and apoptosis  
258 was measured, however, an improvement in data was not observed (data not shown).

259

260 **Fig3. STAT6 siRNA sequences 1 and 4 (STAT6.1 and STAT6.4) induce apoptosis.**

261 (A) Late Apoptosis: percentage of Annexin V and PI positive cells. (B) Total Apoptosis:  
262 percentage of Annexin V positive cells. The graphs represent the mean  $\pm$  SEM of 7  
263 (Control, NT and STAT6.1) or 5 (STAT6.4) independent experiments obtained by flow  
264 cytometry. (C) Representative flow cytometry plots. The X axis represents Annexin V  
265 and the Y axis, PI fluorescence intensity. Quadrants were set according to cells

266 independently stained with Annexin V or PI. Apoptosis was studied 7 days post-  
267 transfection and data were analysed with Flowjo Software. STAT6 siRNA sequences  
268 and a non-targeting siRNA sequence were used at 100 nM as the final concentration.  
269 Non-transfected cells served as control cells and STAT6 siRNA sequences 1 and 4  
270 and non-targeting siRNA are denoted as STAT6.1, STAT6.4 and NT, respectively.

271

272 **STAT6 siRNA sequential transfection works at maintaining**

273 **a reduced number of cancer cells over time.** It is clear from these

274 results that STAT6.1 and STAT6.4 at 100 nM can significantly reduce the number of  
275 live CRC cells cultured for up to 8 days. Further experiments were conducted to see if  
276 the effects of the siRNA sequences could be extended. Serial transfection using  
277 STAT6.1 and STAT6.4 at 100 nM each transfection was developed. First, transfection  
278 was prepared as usual, and 7 days later, a second transfection was performed using  
279 the same STAT6 siRNA sequences (STAT6.1 or STAT6.4) or the other STAT6 siRNA.  
280 The cells were cultured for a total of 15 days. The results showed that STAT6.1 and  
281 STAT6.4 individually achieved less than approximately 30% reduction of the number  
282 of live cells, while the serial combination achieved more than a 30% reduction,  
283 regardless of the combination used (Fig 5A and B). These data confirm that serial  
284 injections in animal models could be effective extending the effects of the siRNA  
285 sequences.

286

287 **Fig4. STAT6 siRNA serial transfection is effective in maintaining a reduced**

288 **number of cells over time.** STAT6 siRNA transfection was carried out at day 1 of cell

289 culture with (A) STAT6.1 and (B) STAT6.4 at 100 nM. A second transfection was

290 carried out in both cases with STAT6.1 and STAT6.4 at the same concentration 7 days

291 after the first transfection. The graphs represent the number of live cells over time  
292 measured at day 8, 13 and 15 counted using NucleoCounter NC-100 as detailed in  
293 the material and methods section. The values were obtained from 1 independent  
294 experiment. Control cells were non-transfected cells and STAT6 siRNA sequences 1  
295 and 4 and non-targeting siRNA are denoted as STAT6.1, STAT6.4 and NT,  
296 respectively. The percentage of reduction of the number of live cells was calculated  
297 by comparison between the mean of NT vs. the mean of STAT6 siRNA sequences  
298 individual transfection, and double transfection with NT (NT+NT) vs. double  
299 transfection with STAT6.1 and STAT6.4.

300

### 301 **JetPEI transfection reagent works for STAT6 siRNA**

302 **treatment *in vitro*.** The previous experiments were conducted using  
303 DharmaFECT, a lipid-based transfection reagent that provides efficient and reliable  
304 transfection at low concentrations with minimal cellular toxicity, but its use has not  
305 been tested *in vivo*. Therefore, once it was established that STAT6.1 and STAT6.4  
306 individually at 100 nM had significant effects on cell proliferation and apoptosis of HT-  
307 29 cells, the efficacy of these STAT6 siRNA sequences was tested using a transfection  
308 reagent with proven efficacy *in vivo*. jetPEI reagent is a linear polyethylenimine  
309 derivative, free of components of animal origin, providing a highly effective and  
310 reproducible gene delivery to adherent and suspension cells and with a similar  
311 composition to *in vivo*-jetPEI, which is widely use in *in vivo* studies. In this case, only  
312 STAT6.1 was tested. Results using jetPEI for transfection showed again that STAT6.1  
313 significantly silenced STAT6 expression, obtaining approximately 80% and  
314 approximately 50% knockdown at the mRNA and protein levels, respectively,  
315 compared with NT cells (Fig 5A and B). Fig 5C shows how STAT6 fluorescence was

316 decreased in silenced HT-29 cells. The next step was to analyse if the effects of  
317 STAT6.1 on HT-29 cell proliferation and apoptosis were reproducible when jetPEI was  
318 used. The results showed that after 8 days of culture, the number of live cells were  
319 significantly decreased, obtaining approximately 50% reduction of the number of live  
320 cells (Fig 5D). However, no significant induction in apoptosis was observed (data not  
321 shown). These results show that the jetPEI transfection reagent could be an option for  
322 future animal studies.

323

324 **Fig 5. JetPEI transfection reagent works for STAT6 siRNA treatment in vitro.** (A)  
325 STAT6 expression at mRNA level. The graph represents the mean  $\pm$  SEM of 3  
326 independent experiments. Total mRNA was measured by real-time PCR and results  
327 were analysed by the  $\Delta\Delta C_t$  method for relative quantifications and values were  
328 normalized to control cells. (B) STAT6 expression at protein level. The graph  
329 represents the mean  $\pm$  SEM of 3 independent experiments. Data was analysed using  
330 Flowjo Software for MacOS. The percentage of STAT6 positive cells is represented  
331 on the Y axis. (C) Representative dot plots and histogram from one set of experiments.  
332 STAT6 fluorescence is represented on the X axis. (D) Cell proliferation analysis.  
333 Number of live cells measured at day 6 and 8 of culture. The graphs represent the  
334 mean  $\pm$  SEM of 3 independent experiments. The number of live cells was calculated  
335 as detailed in the material and methods section using NucleoCounter NC-100.

## 336 Discussion

337 CRC represents the fourth most common cause of death by cancer in the world and  
338 its incidence is increasing every year (1,2). Despite many efforts, the prognosis of  
339 CRC is still poor (19). Thus, exploring the underlying mechanism of CRC and finding

340 new treatment targets are essential for improving the survival rate of CRC patients.  
341 Several studies have shown that STAT6 plays an important role in the progression  
342 and proliferation of several different types of cancer. Barbara C Merk *et al.*  
343 demonstrated in 2011 (25) that STAT6 acts to enhance cell proliferation and invasion  
344 in glioblastoma, which may explain why up-regulation of STAT6 correlates with shorter  
345 survival times in glioma patients. A study in 2007 showed that the actions of STAT6 in  
346 lung cancer were directly involved in COX-2 expression (26). A more recent study  
347 suggests that miR-135b functions as a tumour suppressor, affecting the metastatic  
348 ability of prostate cells by targeting STAT6, and STAT6 knockdown resulted in reduced  
349 cell metastasis. Furthermore, the expression of miR-135b was observed to be  
350 associated with the pathological T stages and levels of total and free PSA in patients  
351 with prostate cancer (27). It has been also shown that the inhibition of the STAT6  
352 pathway in tumor-associated macrophages (TAMs) is a vital therapeutic approach to  
353 attenuate tumor growth and metastatic niche formation in breast cancer (28). In the  
354 same way, Yan D. *et al.* have determined that cytokine-activated STAT3 and STAT6  
355 cooperate in macrophages to promote a secretory phenotype that enhances tumor  
356 progression in a cathepsin-dependent manner (29). STAT6 is also associated with an  
357 increased malignancy and a poor prognosis in CRC patients (18). Moreover, it has  
358 been demonstrated that the IL-13/IL-13R $\alpha$ 1/STAT6/ZEB1 pathway plays a critical role  
359 in promoting aggressiveness of CRC (30). It is for these reasons STAT6 was chosen  
360 in this study as a key target in CRC cells and the reported results suggest that the  
361 STAT6 siRNA sequences, especially STAT6.1 and STAT6.4, have the potential to  
362 treat CRC.

363 This study is not the first time that STAT6 knockdown in HT-29 has been investigated.  
364 Zhang MS *et al.* showed in 2006 that STAT6-specific short hairpin RNAs (shRNAs)

365 inhibit proliferation and induce apoptosis in CRC HT-29 cells (31). They analysed the  
366 expression of total STAT6 and phosphorylated STAT6 protein by semiquantitative RT-  
367 PCR, obtaining a significant reduction of the STAT6 expression. HT-29 cell viability  
368 was also tested 72 hours post-transfection, and the results showed a greatly  
369 decreased viability. Apoptosis analysis by flow cytometry (Annexin V and PI) indicated  
370 that STAT6 shRNAs induced significant early apoptotic events (Annexin V<sup>+</sup>/ PI<sup>-</sup> cells).  
371 In this study, STAT6.1 and STAT6.4 also induced late apoptosis (Annexin V<sup>+</sup>/ PI<sup>+</sup>).  
372 This may be due to the fact that the apoptosis assay was analyzed after 7 days post-  
373 transfection, which would allow the STAT6 pathway to complete its action mechanism,  
374 or that the STAT6 siRNA sequences are more powerful at inducing the apoptosis of  
375 the cancer cells. In this study, the effects of STAT6 siRNA over a longer period of time  
376 (7 and 15 days) were investigated and this provided new data regarding the effects of  
377 STAT6 on cell proliferation and apoptosis. Moreover, Zhang *et al.* used shRNA, which  
378 is expressed after nuclear delivery of an shRNA-expressing plasmid DNA (pDNA), and  
379 the duration of shRNA expression depends on the use of viral or non-viral vectors.  
380 Conversely, the delivery of siRNAs as in this study avoids the barrier of the nuclear  
381 membrane as it acts in the cytosol (32). siRNAs offer additional advantages over  
382 shRNAs. Pre-designed siRNA duplexes are available from various sources or can be  
383 custom designed. Furthermore, siRNAs are easy to modify to increase their stability  
384 without altering their structure and efficiency and can be conjugated with fluorophores  
385 for *in vivo* tracking. In addition to this, the amount of exogenous nucleic acid introduced  
386 into the cells is much lower, as siRNAs consist of only duplexes of 19 nucleotide pairs  
387 and no insertion vector is required, thus reducing probable side effects.  
388 It is for these and other reasons why siRNAs are becoming a popular tool for cancer  
389 therapy. To date, approximately 20 clinical trials have been initiated using siRNA-



390 based therapeutics. However, several barriers still exist to achieving effective and  
391 controlled *in vivo* delivery and these limits the use of siRNAs in the clinic. Post-  
392 intravenous injection, the siRNA complex must navigate the circulatory system of the  
393 body while avoiding kidney filtration, uptake by phagocytes, aggregation with serum  
394 proteins and enzymatic degradation by endogenous nucleases (33,34). The current  
395 siRNA delivery systems for cancer therapy mainly include chemical modifications of  
396 siRNA, lipid-based, polymer-based, and conjugate siRNA delivery systems, as well as  
397 co-delivery of siRNA and anticancer drugs, and inorganic nanoparticles (35). These  
398 modifications help to address the problems associated with naked siRNA delivery and  
399 effectively introduce the siRNA inside the target cells. In this study, two transfection  
400 reagents have been tested, DharmaFECT transfection reagent 1 and jetPEI. The  
401 former is a lipid-based formulation and the latter is a linear polyethylenimine (PEI)  
402 derivative. Both of these reagents effectively delivered the STAT6 siRNAs into the  
403 cells, as STAT6 expression was significantly knocked down in both cases.  
404 Nevertheless, jetPEI, unlike DharmaFECT, has been successfully tested in several  
405 animal studies and is known to form stable complexes with the nucleic acid, protecting  
406 it from degradation. Moreover, good manufacturing practice (GMP) grade *in vivo*-  
407 jetPEI is being used in several ongoing preclinical studies and phase I and II clinical  
408 trials. Thus, this makes jetPEI an excellent candidate for future animal and clinical  
409 studies using the STAT6 siRNA sequences used in this study.

410 In conclusion, all four STAT6 siRNA sequences significantly silenced STAT6  
411 expression, reduced the number of live HT-29 cells and induced HT-29 apoptosis.  
412 Consequently, all four sequences, especially STAT6.1 and STAT6.4, are good  
413 candidates to develop as treatments of CRC. Animal studies using  
414 immunocompromised mice with human colon cancer xenografts are currently being

415 planned. These will permit the determination of the *in vivo* effectiveness of the STAT6  
416 siRNA sequences. The effectiveness of the STAT6 sequences in other cancers is also  
417 being tested. The experiments conducted in HT-29 cells are being reproduced in  
418 STAT6-expressing breast cancer cells and the results are promising.  
419

## 420 **References**

- 421 1. Ferlay J, Soerjomataram I, Dikshit R, Eser S, Mathers C, Rebelo M, et al. Cancer  
422 incidence and mortality worldwide: Sources, methods and major patterns in  
423 GLOBOCAN 2012: Globocan 2012. *Int J Cancer*. 2015 Mar 1;136(5):E359–86.
- 424 2. Stewart BW, Wild C, International Agency for Research on Cancer, World Health  
425 Organization. World cancer report 2014 [Internet]. 2014 [cited 2018 Oct 8].  
426 Available from: [http://libweb.iaea.org/library/eBooks/World-Cancer-](http://libweb.iaea.org/library/eBooks/World-Cancer-Report2014.pdf)  
427 [Report2014.pdf](http://libweb.iaea.org/library/eBooks/World-Cancer-Report2014.pdf)
- 428 3. Mármol I, Sánchez-de-Diego C, Pradilla Dieste A, Cerrada E, Rodriguez Yoldi M.  
429 Colorectal Carcinoma: A General Overview and Future Perspectives in Colorectal  
430 Cancer. *Int J Mol Sci*. 2017 Jan 19;18(1):197.
- 431 4. Darnell JE. STATs and Gene Regulation. *Science*. 1997 Sep 12;277(5332):1630.
- 432 5. Bowman T, Garcia R, Turkson J, Jove R. STATs in oncogenesis. *Oncogene*. 2000  
433 May 22;19:2474.
- 434 6. Johnson DE, O’Keefe RA, Grandis JR. Targeting the IL-6/JAK/STAT3 signalling  
435 axis in cancer. *Nat Rev Clin Oncol*. 2018 Feb 6;15:234.

- 436 7. Hou J, Schindler U, Henzel W, Ho T, Brasseur M, McKnight S. An interleukin-4-  
437 induced transcription factor: IL-4 Stat. *Science*. 1994 Sep 16;265(5179):1701.
- 438 8. Kotanides H, Reich N. Requirement of tyrosine phosphorylation for rapid activation  
439 of a DNA binding factor by IL-4. *Science*. 1993 Nov 19;262(5137):1265.
- 440 9. Mikita T, Campbell D, Wu P, Williamson K, Schindler U. Requirements for  
441 interleukin-4-induced gene expression and functional characterization of Stat6.  
442 *Mol Cell Biol*. 1996 Oct;16(10):5811–20.
- 443 10. Wang C, Zhu C, Wei F, Zhang L, Mo X, Feng Y, et al. Constitutive Activation of  
444 Interleukin-13/STAT6 Contributes to Kaposi's Sarcoma-Associated Herpesvirus-  
445 Related Primary Effusion Lymphoma Cell Proliferation and Survival. Longnecker  
446 RM, editor. *J Virol*. 2015 Oct 15;89(20):10416–26.
- 447 11. Li BH, Yang XZ, Li PD, Yuan Q, Liu XH, Yuan J, et al. IL-4/Stat6 activities  
448 correlate with apoptosis and metastasis in colon cancer cells. *Biochem Biophys*  
449 *Res Commun*. 2008 May 2;369(2):554–60.
- 450 12. Ostrand-Rosenberg S, Grusby MJ, Clements VK. Cutting Edge: STAT6-  
451 Deficient Mice Have Enhanced Tumor Immunity to Primary and Metastatic  
452 Mammary Carcinoma. *J Immunol*. 2000 Dec 1;165(11):6015–9.
- 453 13. Ostrand-Rosenberg S, Sinha P, Clements V, Dissanayake SI, Miller S, Davis  
454 C, et al. Signal transducer and activator of transcription 6 (Stat6) and CD1:  
455 inhibitors of immunosurveillance against primary tumors and metastatic disease.  
456 *Cancer Immunol Immunother*. 2004 Feb 1;53(2):86–91.

- 457 14. Uhlén M, Björling E, Agaton C, Szigyarto CA-K, Amini B, Andersen E, et al. A  
458 Human Protein Atlas for Normal and Cancer Tissues Based on Antibody  
459 Proteomics. *Mol Cell Proteomics*. 2005 Dec;4(12):1920–32.
- 460 15. Nappo G, Handle F, Santer FR, McNeill RV, Seed RI, Collins AT, et al. The  
461 immunosuppressive cytokine interleukin-4 increases the clonogenic potential of  
462 prostate stem-like cells by activation of STAT6 signalling. *Oncogenesis*. 2017 May  
463 29;6(5):e342.
- 464 16. Gooch JL, Christy B, Yee D. STAT6 Mediates Interleukin-4 Growth Inhibition in  
465 Human Breast Cancer Cells. *Neoplasia*. 2002;4(4):324–31.
- 466 17. Zhang WJ, Li BH, Yang XZ, Li PD, Yuan Q, Liu XH, et al. IL-4-induced Stat6  
467 activities affect apoptosis and gene expression in breast cancer cells. *Cytokine*.  
468 2008 Apr;42(1):39–47.
- 469 18. Wang C-G. EZH2 and STAT6 expression profiles are correlated with colorectal  
470 cancer stage and prognosis. *World J Gastroenterol*. 2010;16(19):2421.
- 471 19. Street W. Colorectal Cancer Facts & Figures 2017-2019. :40.
- 472 20. Fire A, Xu S, Montgomery MK, Kostas SA, Driver SE, Mello CC. Potent and  
473 specific genetic interference by double-stranded RNA in *Caenorhabditis elegans*.  
474 *Nature*. 1998 Feb 19;391:806.
- 475 21. Agrawal N, Dasaradhi PVN, Mohammed A, Malhotra P, Bhatnagar RK,  
476 Mukherjee SK. RNA Interference: Biology, Mechanism, and Applications. *Microbiol*  
477 *Mol Biol Rev*. 2003 Dec 1;67(4):657–85.

- 478 22. Carthew RW, Sontheimer EJ. Origins and Mechanisms of miRNAs and siRNAs.  
479 Cell. 2009 Feb;136(4):642–55.
- 480 23. Chakraborty C, Sharma AR, Sharma G, Doss CGP, Lee S-S. Therapeutic  
481 miRNA and siRNA: Moving from Bench to Clinic as Next Generation Medicine. Mol  
482 Ther - Nucleic Acids. 2017 Sep;8:132–43.
- 483 24. Walker W, Hopkin M. (54) MATERIALS AND METHODS FOR TREATMENT  
484 OF ALLERGIC DISEASE. :46.
- 485 25. Merk BC, Owens JL, Lopes M-BS, Silva CM, Hussaini IM. STAT6 expression  
486 in glioblastoma promotes invasive growth. BMC Cancer [Internet]. 2011 Dec [cited  
487 2018 Sep 4];11(1). Available from:  
488 <http://bmccancer.biomedcentral.com/articles/10.1186/1471-2407-11-184>
- 489 26. Cui X, Zhang L, Luo J, Rajasekaran A, Hazra S, Cacalano N, et al.  
490 Unphosphorylated STAT6 contributes to constitutive cyclooxygenase-2  
491 expression in human non-small cell lung cancer. Oncogene. 2007  
492 Jun;26(29):4253–60.
- 493 27. Wang N, Tao L, Zhong H, Zhao S, Yu Y, Yu B, et al. miR-135b inhibits tumour  
494 metastasis in prostate cancer by targeting STAT6. Oncol Lett. 2016  
495 Jan;11(1):543–50.
- 496 28. Binnemars-Postma K, Bansal R, Storm G, Prakash J. Targeting the Stat6  
497 pathway in tumor-associated macrophages reduces tumor growth and metastatic  
498 niche formation in breast cancer. FASEB J. 2018 Feb;32(2):969–78.

- 499 29. Yan D, Wang H-W, Bowman RL, Joyce JA. STAT3 and STAT6 Signaling  
500 Pathways Synergize to Promote Cathepsin Secretion from Macrophages via  
501 IRE1 $\alpha$  Activation. *Cell Rep.* 2016 Sep;16(11):2914–27.
- 502 30. Cao H, Zhang J, Liu H, Wan L, Zhang H, Huang Q, et al. IL-13/STAT6 signaling  
503 plays a critical role in the epithelial-mesenchymal transition of colorectal cancer  
504 cells. *Oncotarget* [Internet]. 2016 Sep 20 [cited 2018 Sep 4];7(38). Available from:  
505 <http://www.oncotarget.com/fulltext/11282>
- 506 31. Zhang M, Zhou Y, Zhang W, Zhang X, Pan Q, Ji X, et al. Apoptosis induced by  
507 short hairpin RNA-mediated STAT6 gene silencing in human colon cancer cells.  
508 *Chin Med J (Engl)*. 2006 May;119(10):801–8.
- 509 32. Rao DD, Vorhies JS, Senzer N, Nemunaitis J. siRNA vs. shRNA: Similarities  
510 and differences. *Adv Drug Deliv Rev.* 2009 Jul;61(9):746–59.
- 511 33. Alexis F, Pridgen E, Molnar LK, Farokhzad OC. Factors Affecting the Clearance  
512 and Biodistribution of Polymeric Nanoparticles. *Mol Pharm.* 2008 Aug;5(4):505–  
513 15.
- 514 34. Whitehead KA, Langer R, Anderson DG. Knocking down barriers: advances in  
515 siRNA delivery. *Nat Rev Drug Discov.* 2009 Feb 1;8:129.
- 516 35. Singh A, Trivedi P, Jain NK. Advances in siRNA delivery in cancer therapy. *Artif*  
517 *Cells Nanomedicine Biotechnol.* 2018 Feb 17;46(2):274–83.

518

519

520

## 521 **Supporting information**

522 **S1Fig. Optimal dose of STAT6 siRNA sequences.** (A) STAT6 mRNA level measure.

523 The graphs represent the mean  $\pm$  SEM of 3 independent experiments. Values were  
524 obtained by real-time PCR and results were analysed by  $\Delta\Delta$ Ct method for relative  
525 quantifications. The fold change is represented on the Y axis, and values are  
526 normalized to control cells. (B) STAT6 protein level analysis. The graphs represent  
527 the mean of the percentage of STAT6 positive cells  $\pm$  SEM of 2 independent  
528 experiments obtained by flow cytometry. The percentage of STAT6 positive cells is  
529 represented on the Y axis. STAT6 siRNAs and non-targeting siRNA were used at 10,  
530 25, 50, 100 and 200 nM as the final concentration. Control cells were non-transfected  
531 cells and STAT6 siRNA sequences 1, 2, 3 and 4 and non-targeting siRNA are denoted  
532 as STAT6.1, STAT6.2, STAT6.3 and STAT6.4 and NT, respectively.

533

534 **S2Fig. Cell proliferation using 100 nM STAT6 siRNA sequences 1 to 4.** (A)

535 Number of live cells measured at day 3, 6 and 8 of culture. The graphs represent the  
536 mean  $\pm$  SEM of 2 independent experiments. (B) The graph shows how cells grew over  
537 time and represents the mean  $\pm$  SEM of the independent experiments shown in A.  
538 The number of live cells was calculated as detailed in the material and methods  
539 section using NucleoCounter NC-100. STAT6 siRNAs and non-targeting siRNA were  
540 used at 100 nM as final concentration. (C) Inverted microscope image taken at day 8  
541 of culture. Control cells were non-transfected cells and STAT6 siRNA sequences 1, 2,  
542 3 and 4 and non-targeting siRNA are denoted as STAT6.1, STAT6.2, STAT6.3 and  
543 STAT6.4 and NT, respectively. The percentage of reduction of the number of live cells  
544 is calculated by comparison between the mean of NT vs. the mean of STAT6 siRNAs.

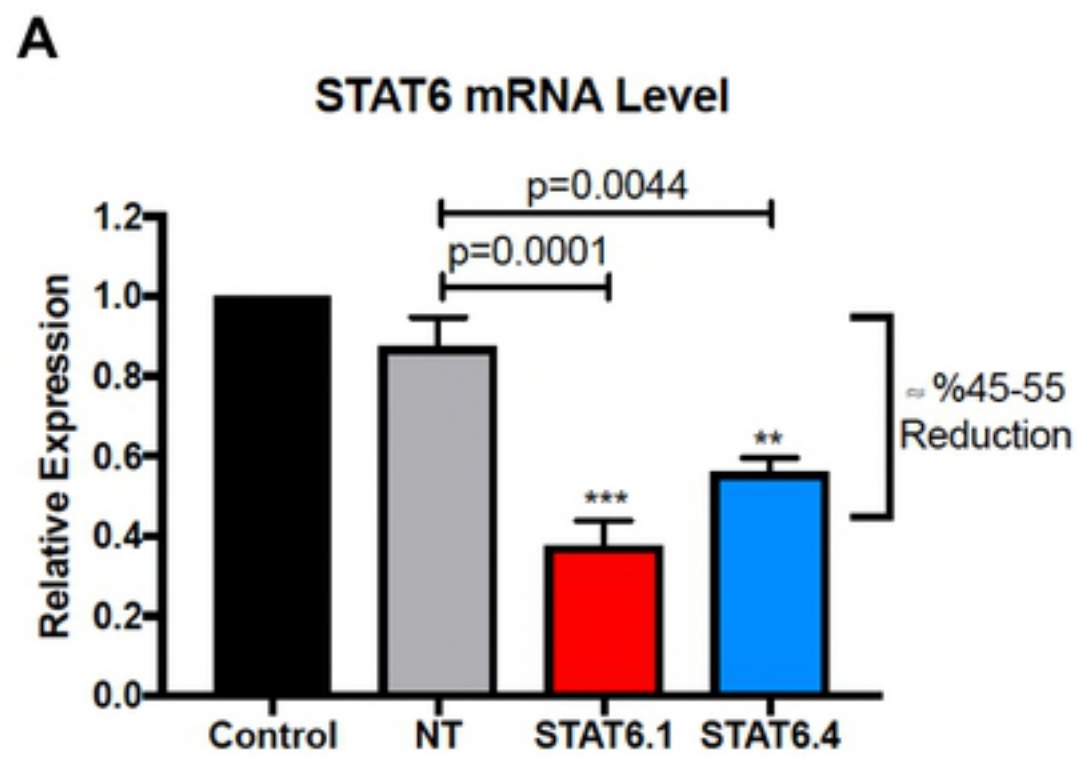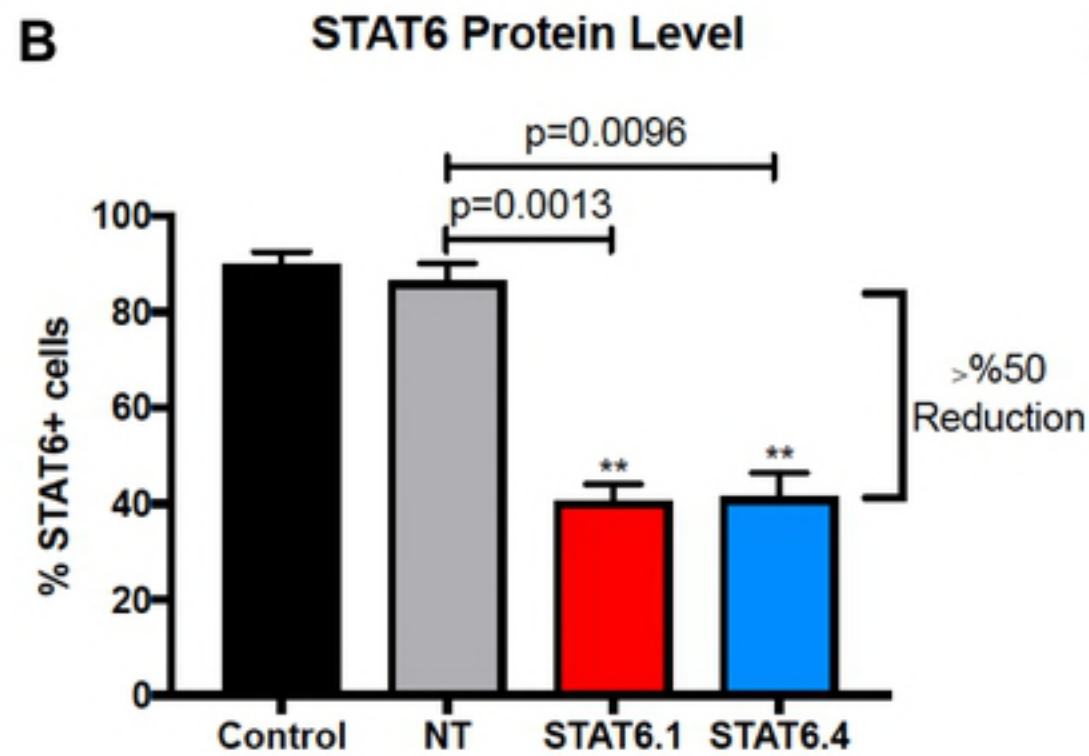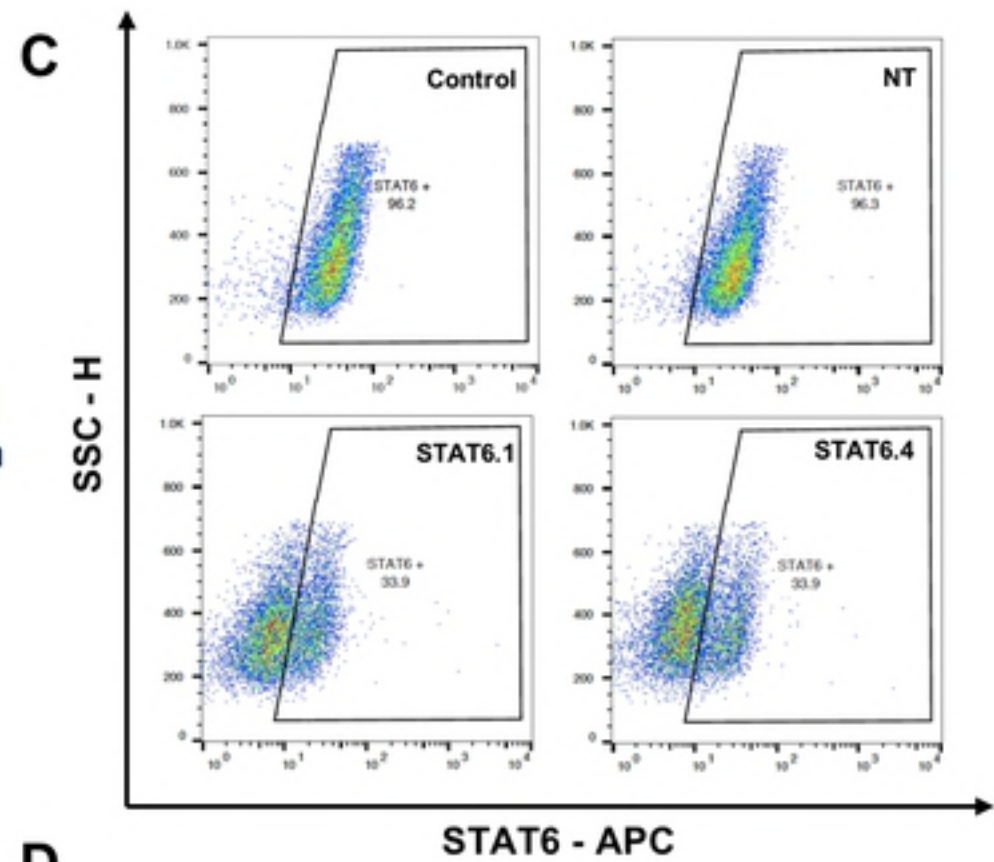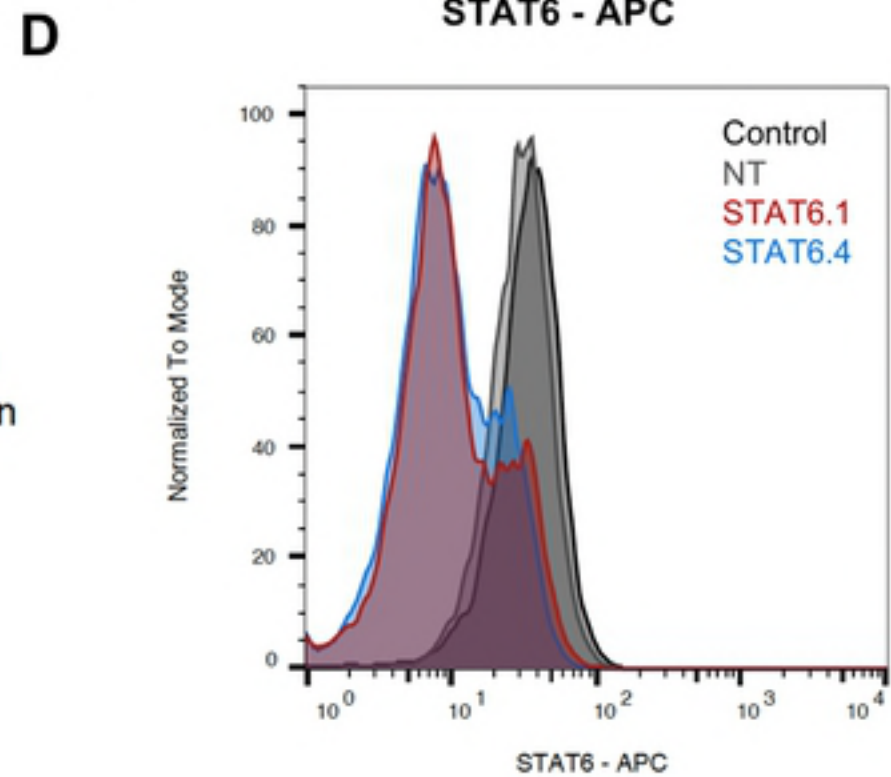

Fig1



**A**

bioRxiv preprint doi: <https://doi.org/10.1101/462895>; this version posted November 5, 2018. The copyright holder for this preprint (which was not certified by peer review) is the author/funder, who has granted bioRxiv a license to display the preprint in perpetuity. It is made available under aCC-BY 4.0 International license.

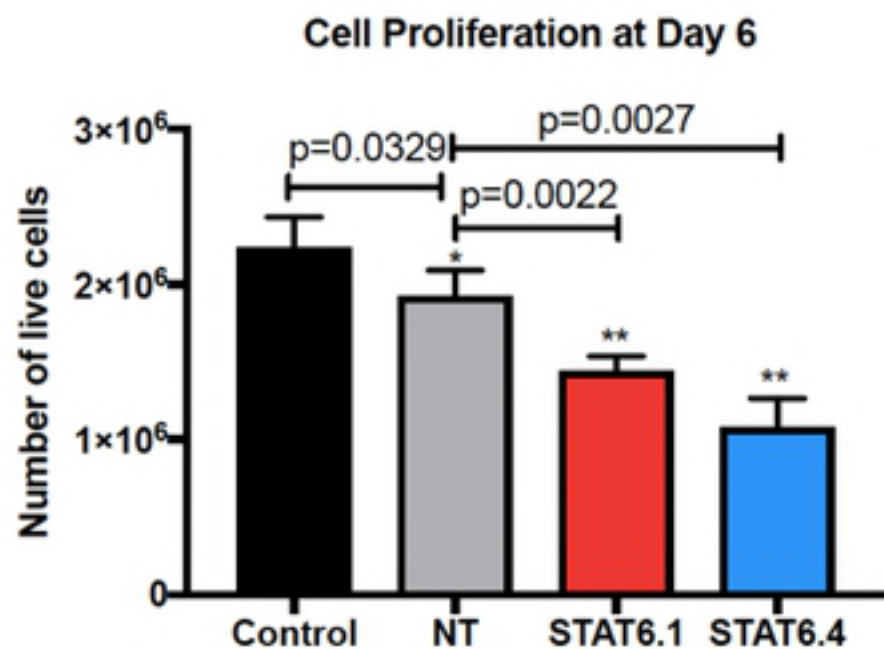**B**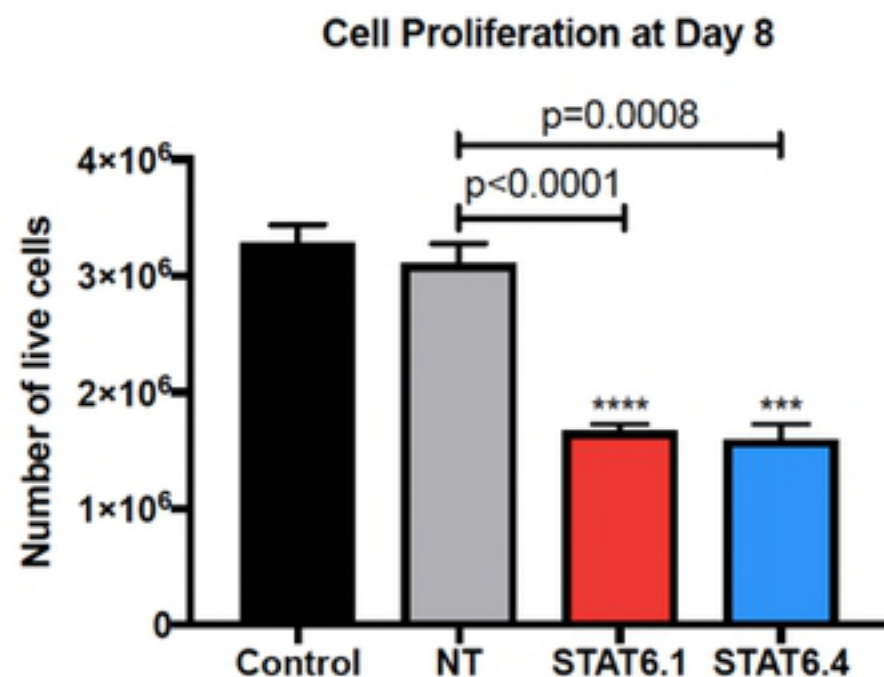**C**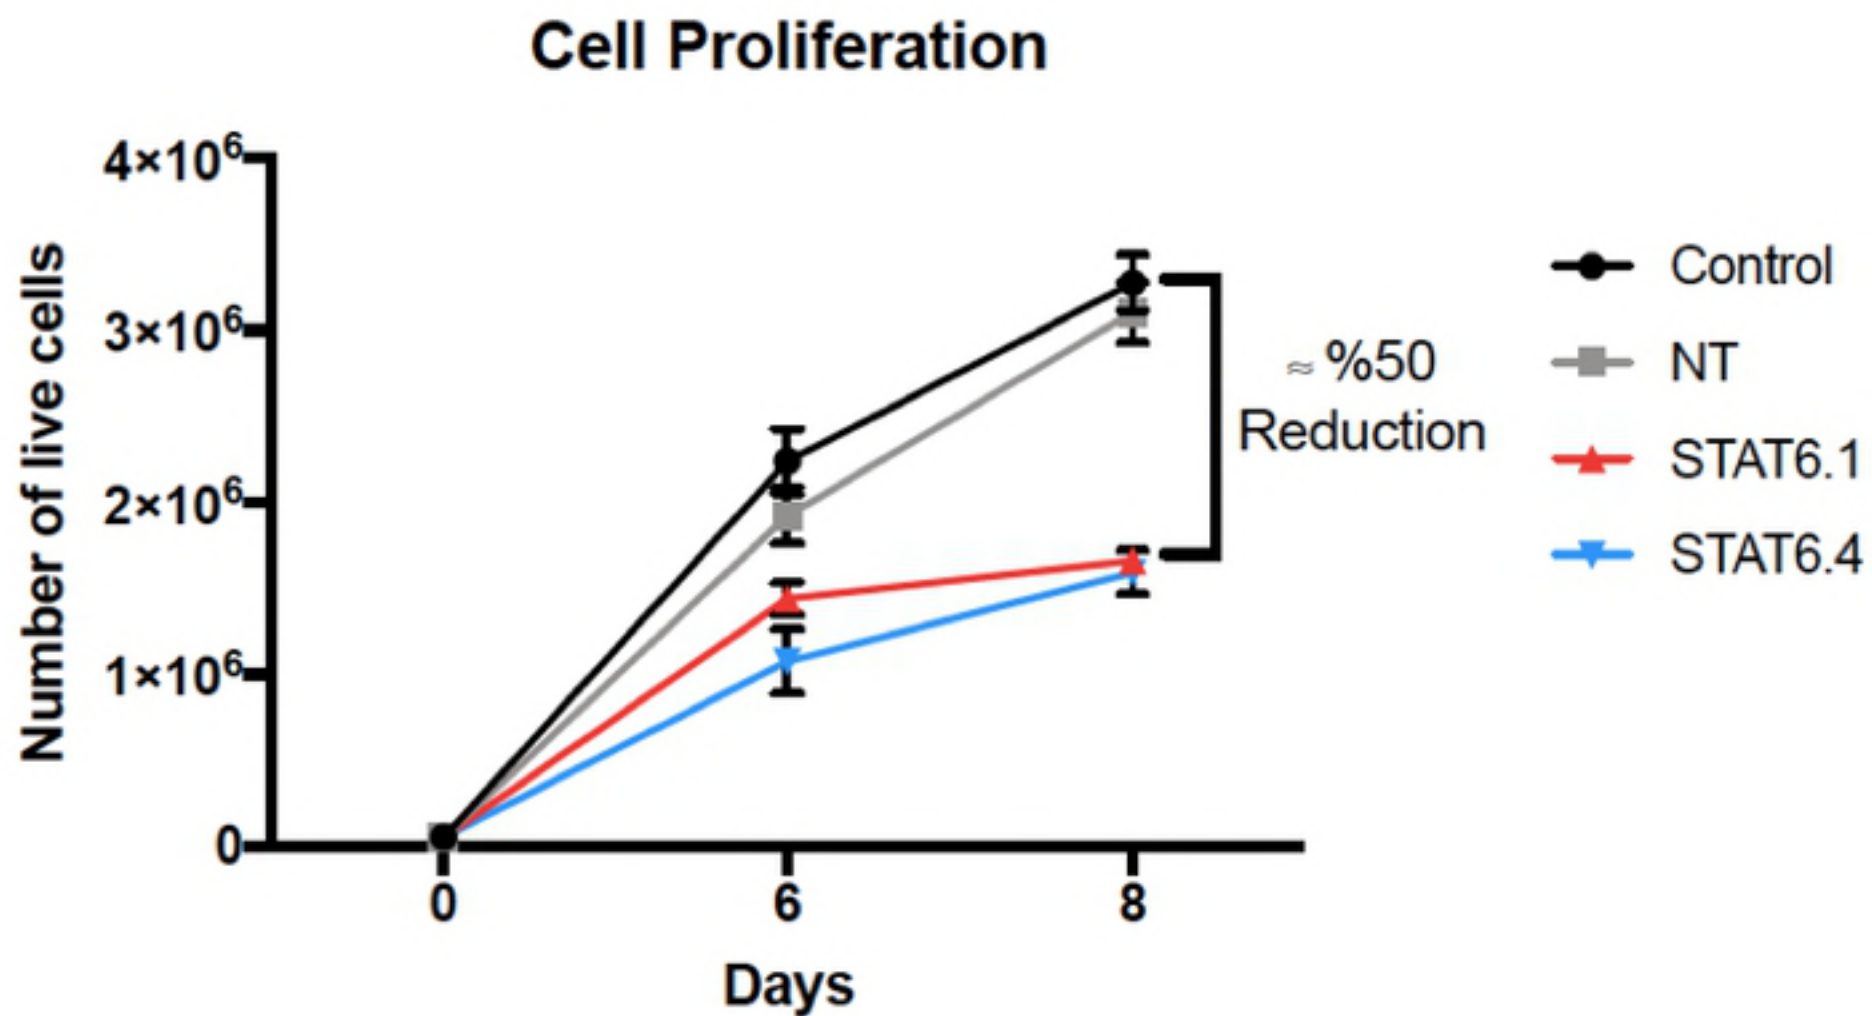

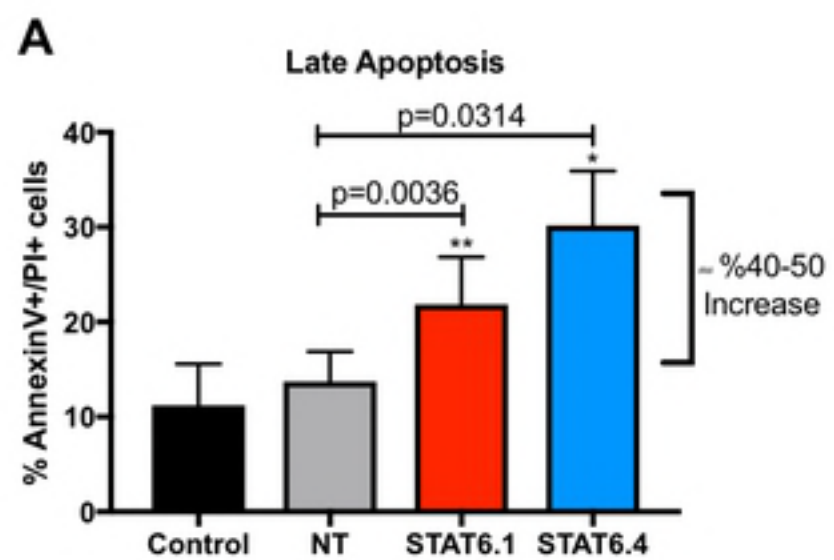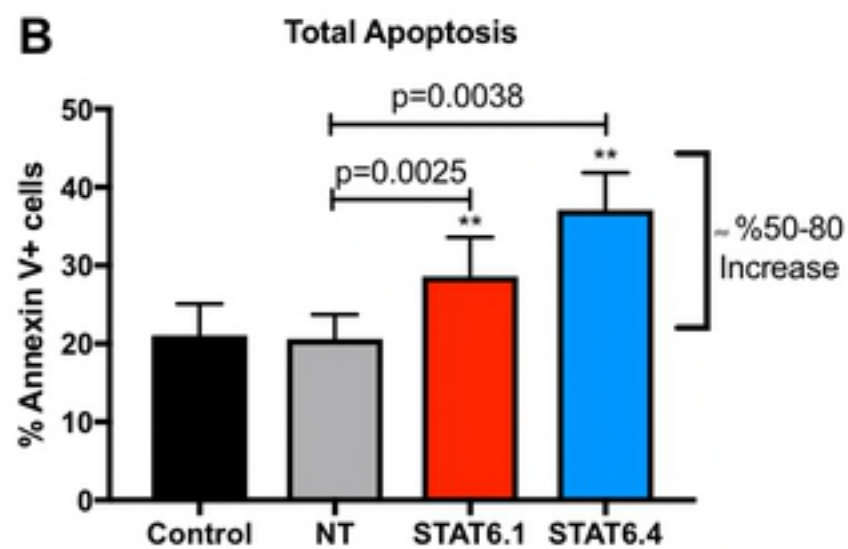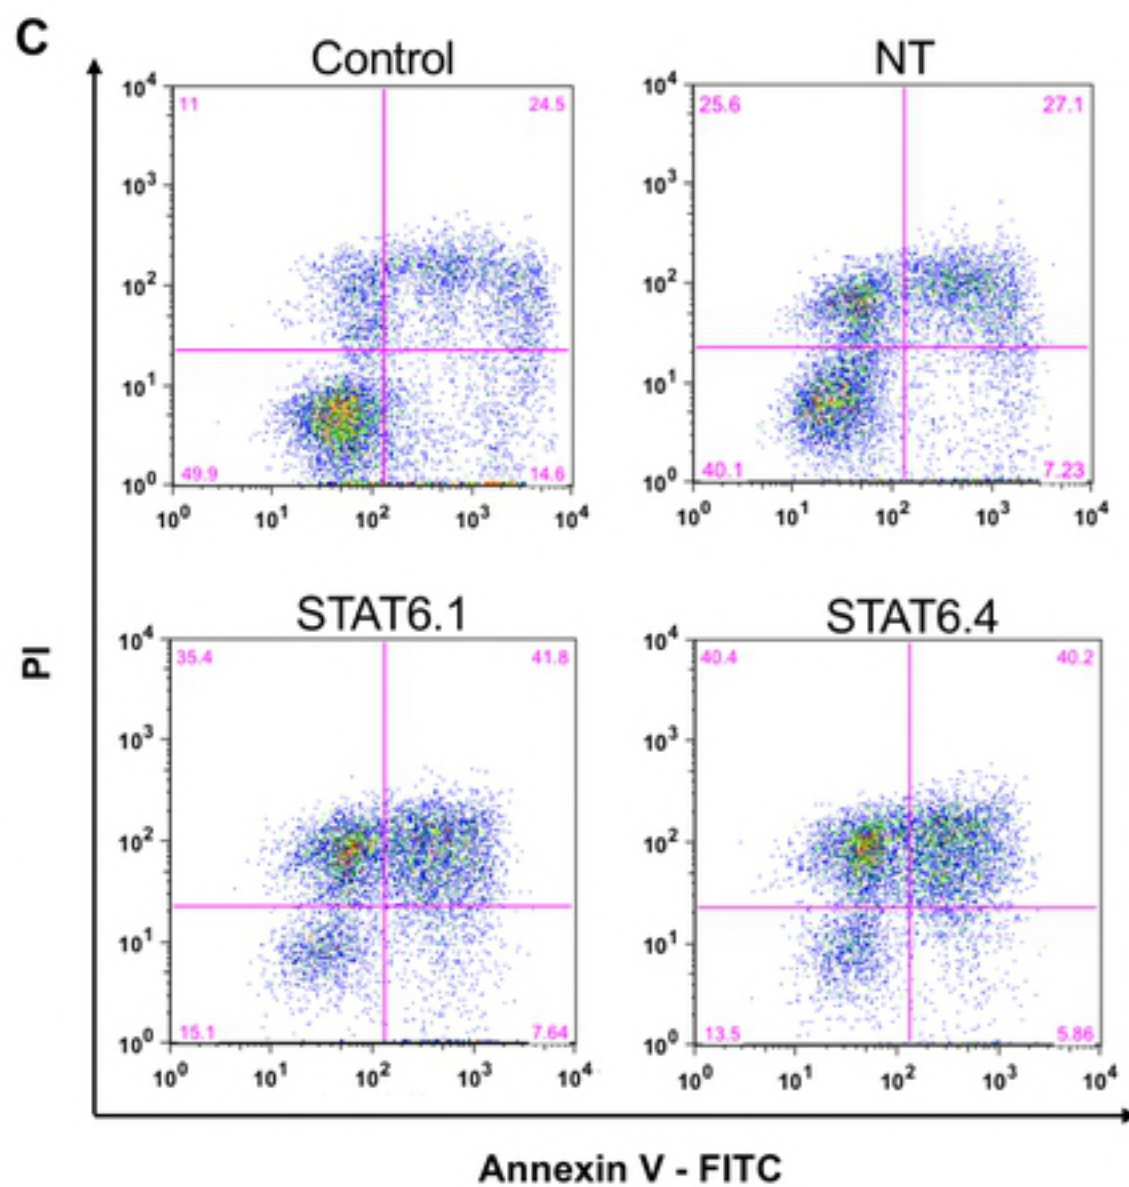

Fig3

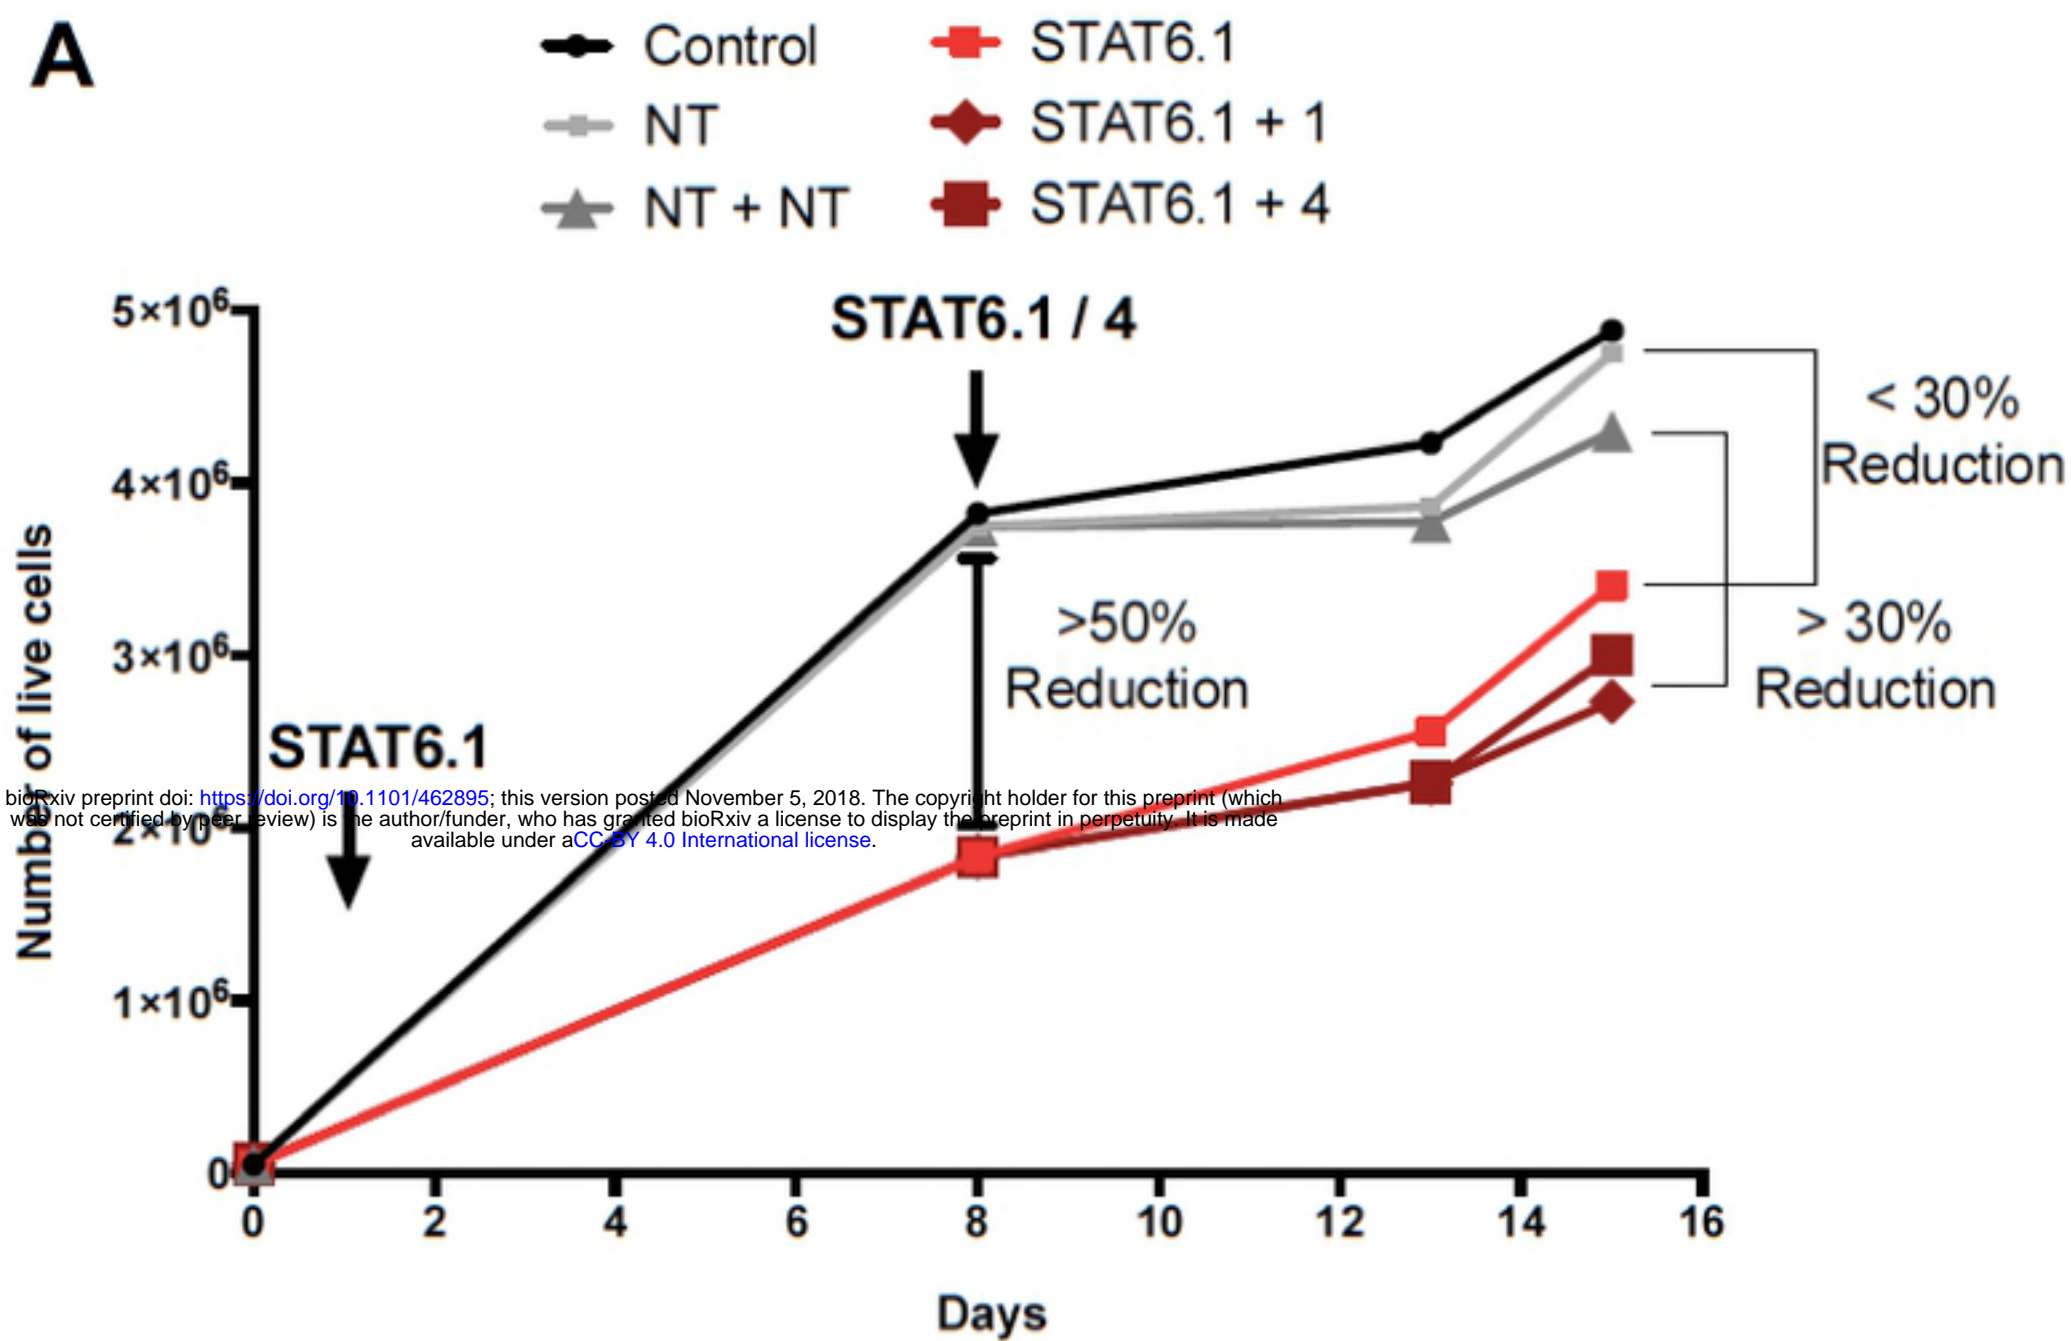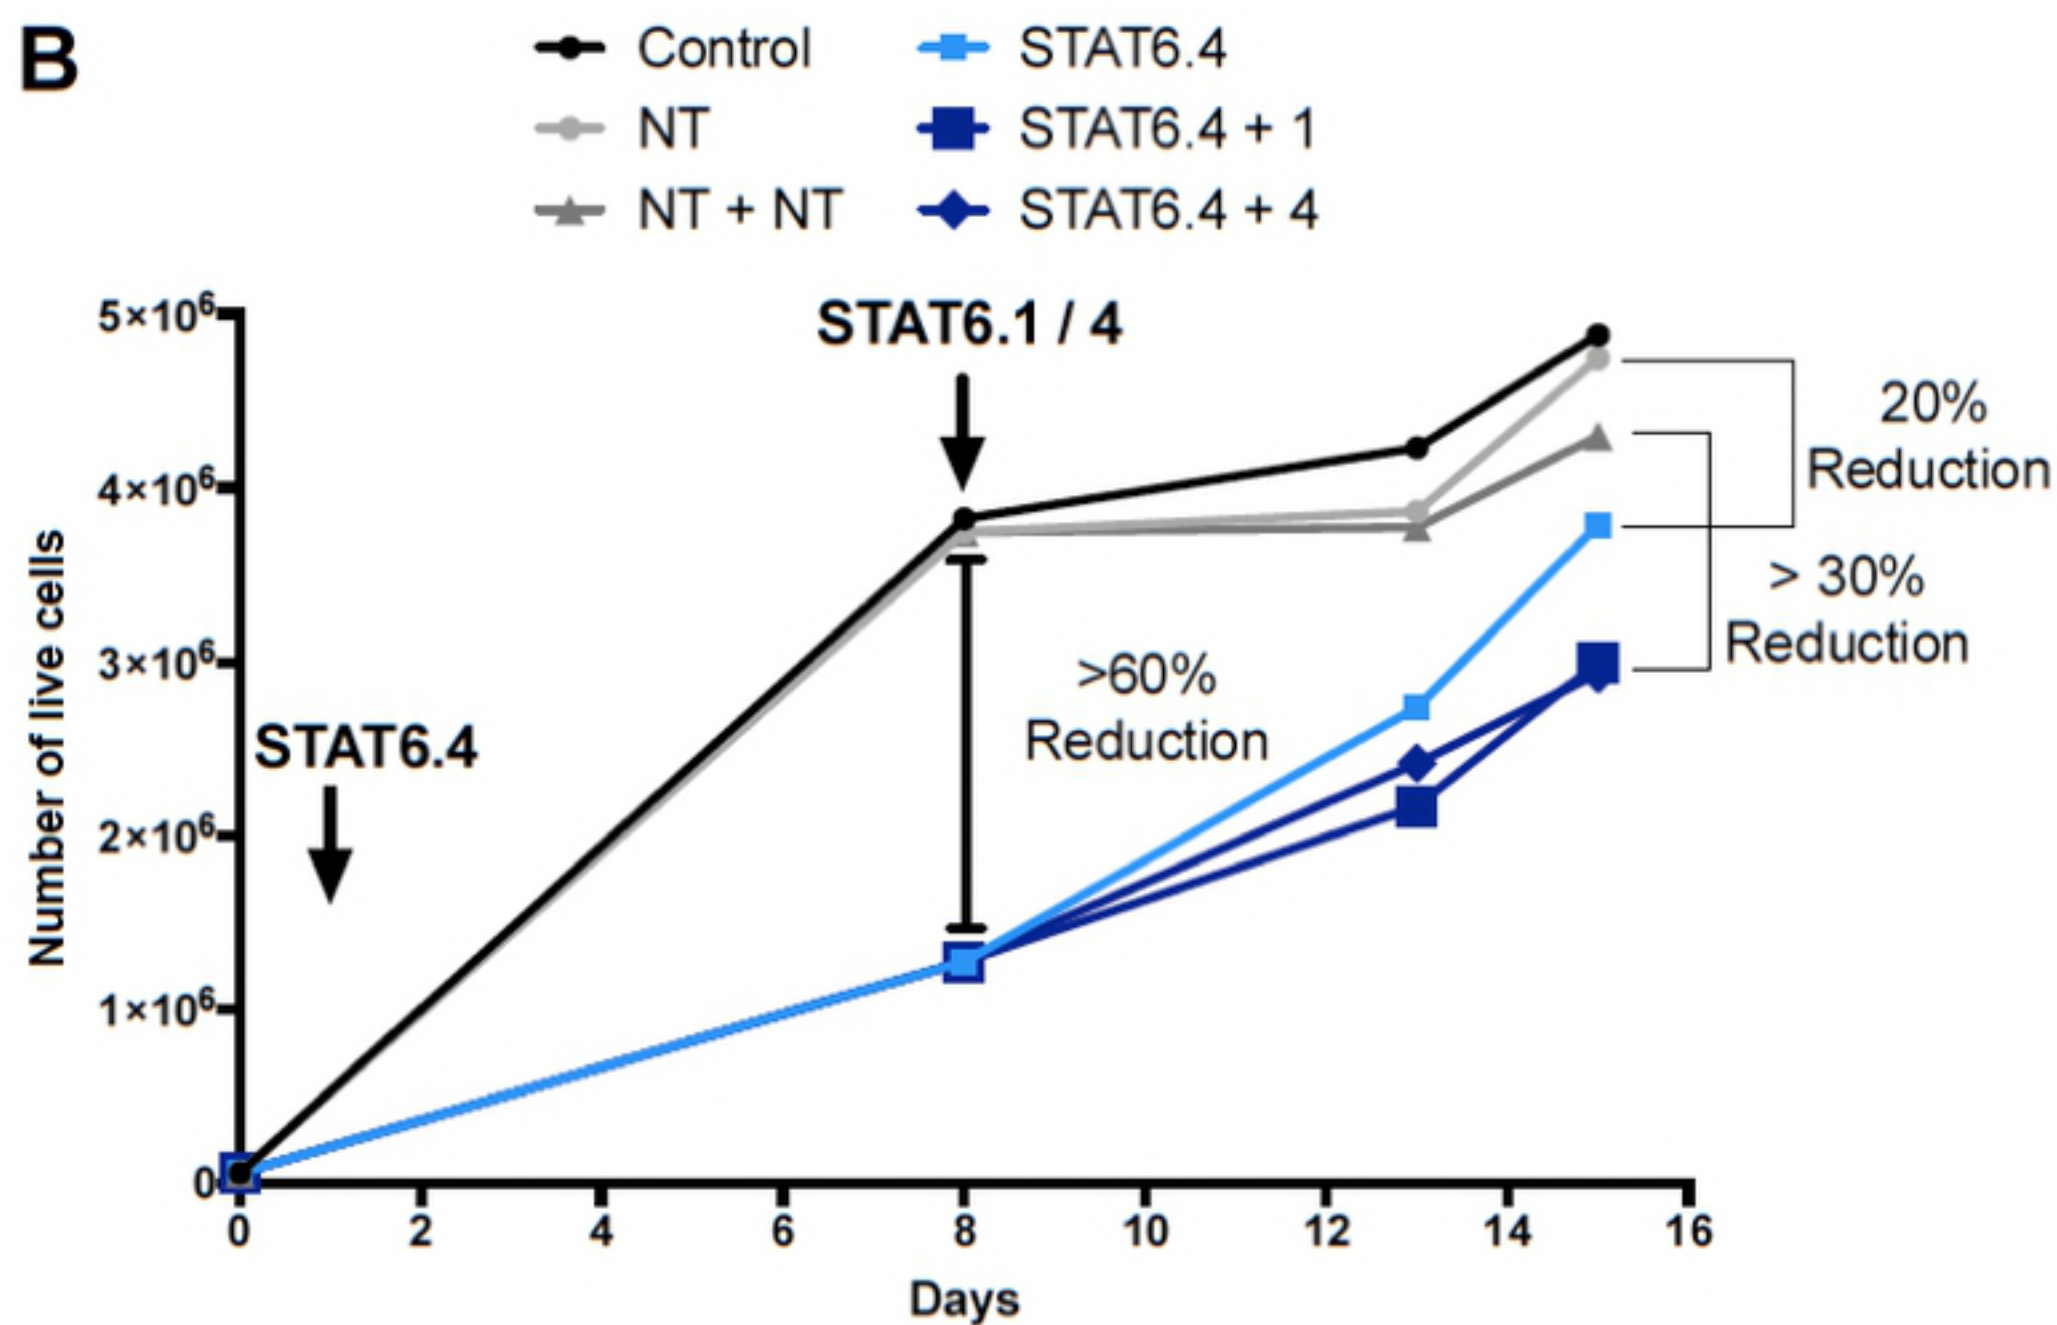

Fig4

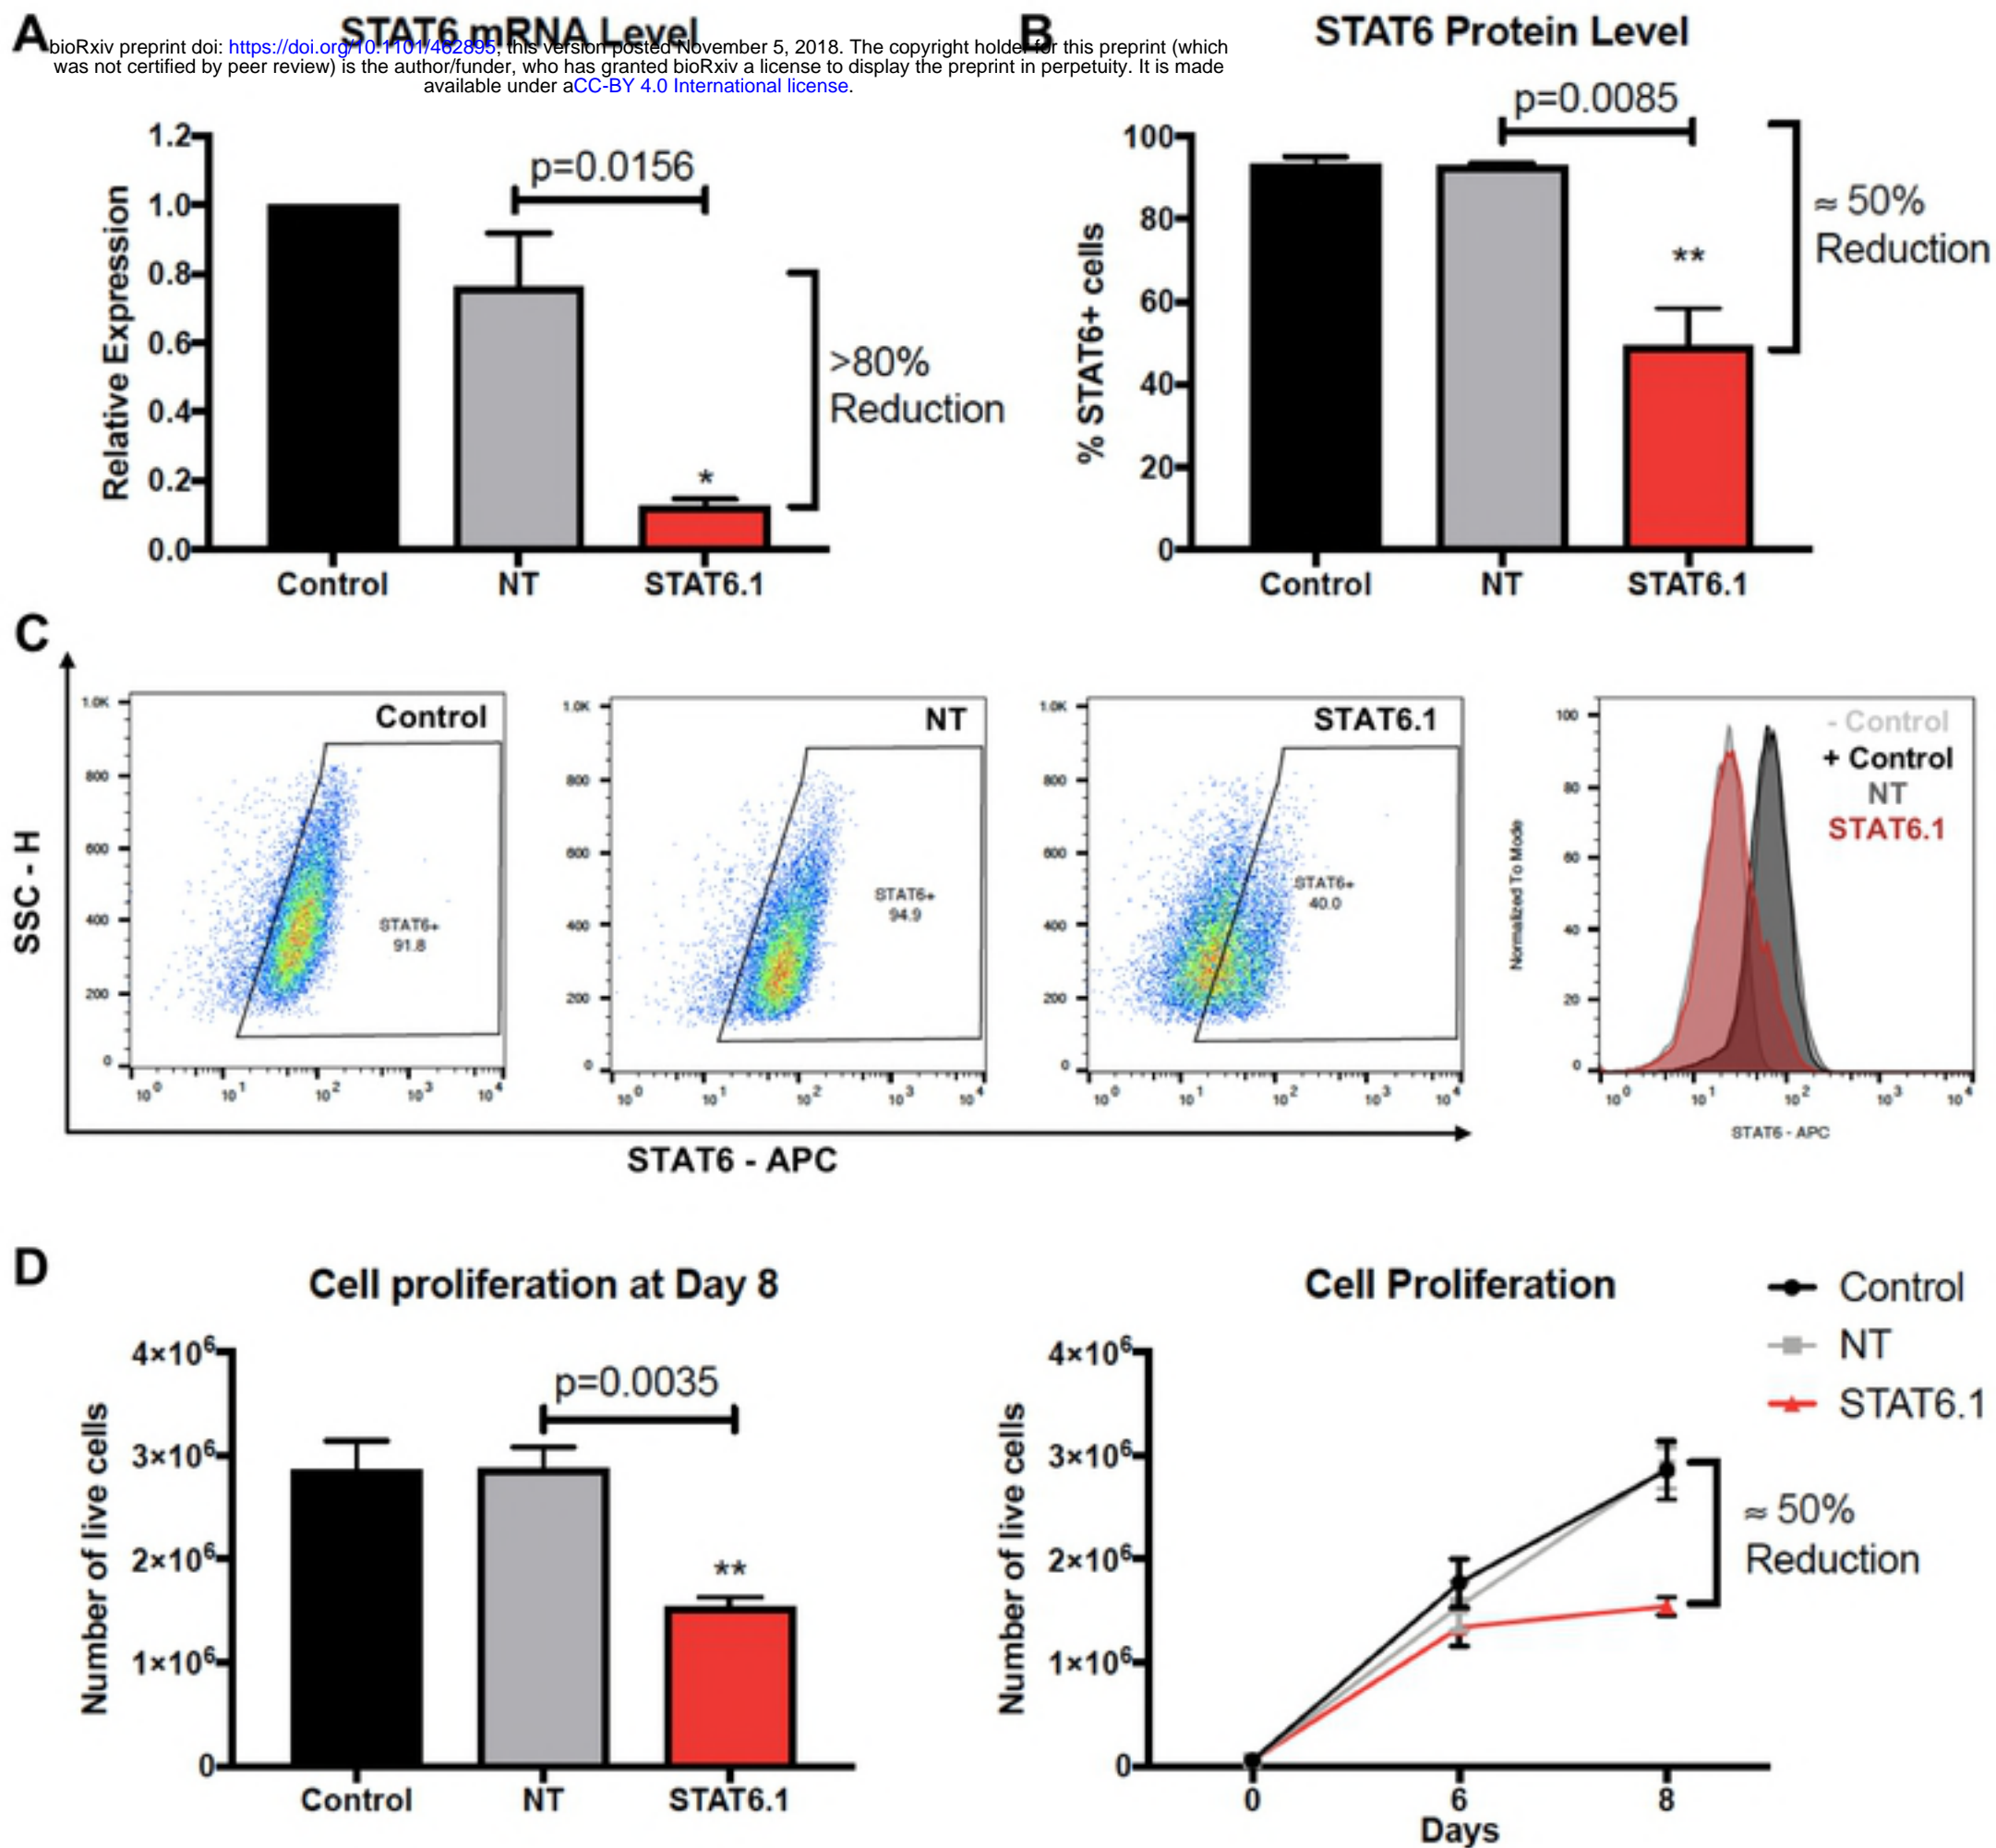

**A**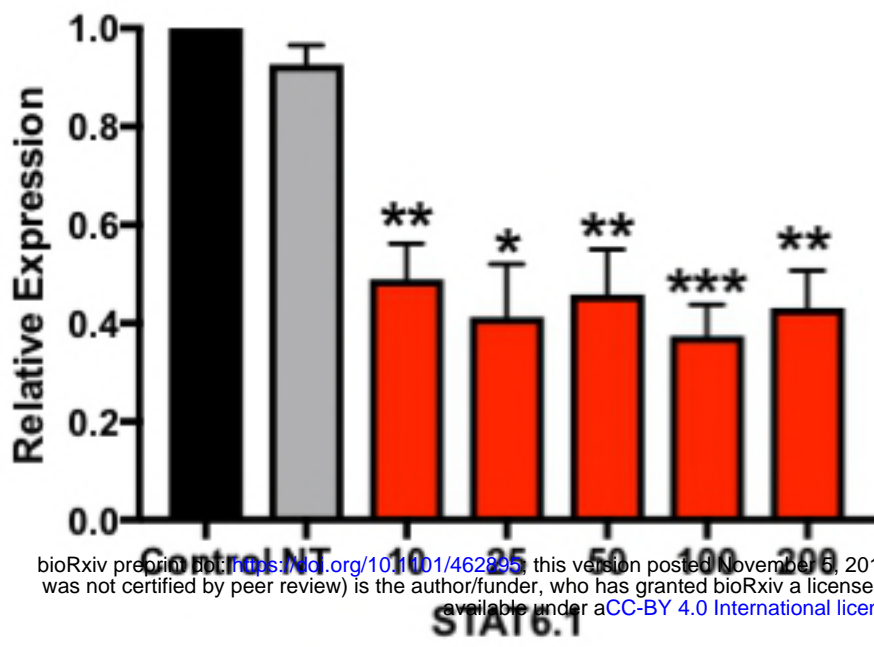**B**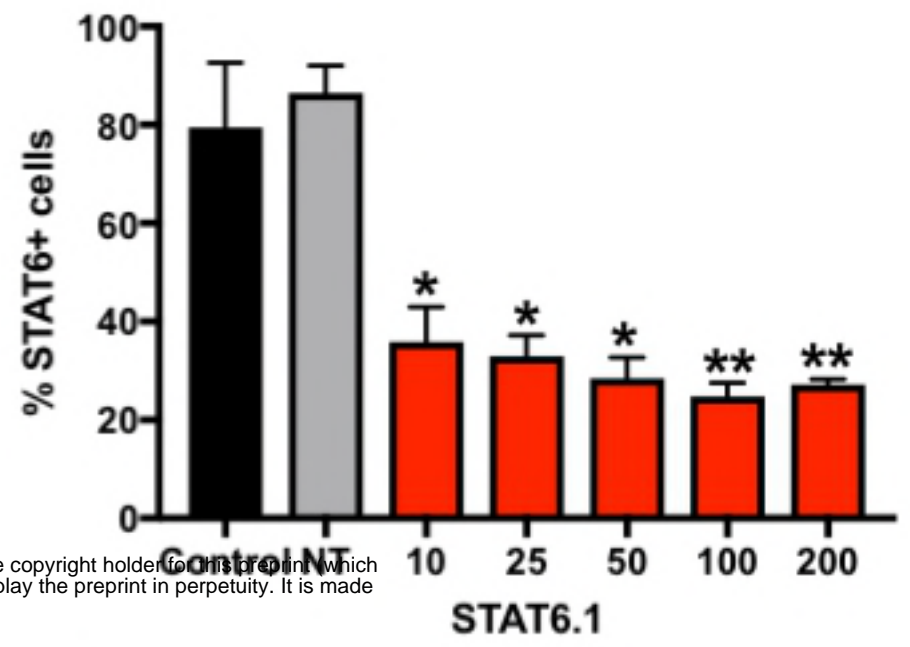

bioRxiv preprint doi: <https://doi.org/10.1101/462895>; this version posted November 6, 2018. The copyright holder for this preprint (which was not certified by peer review) is the author/funder, who has granted bioRxiv a license to display the preprint in perpetuity. It is made available under aCC-BY 4.0 International license.

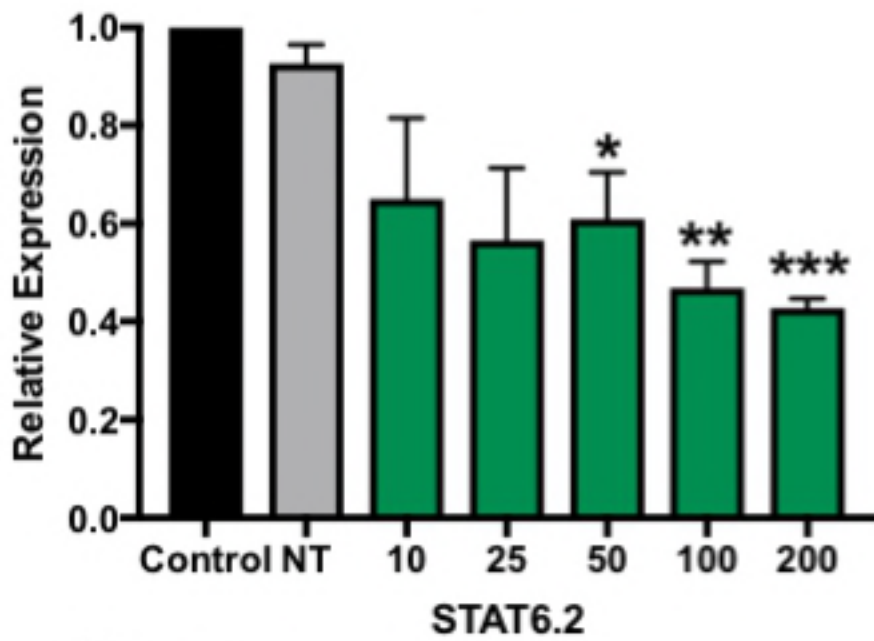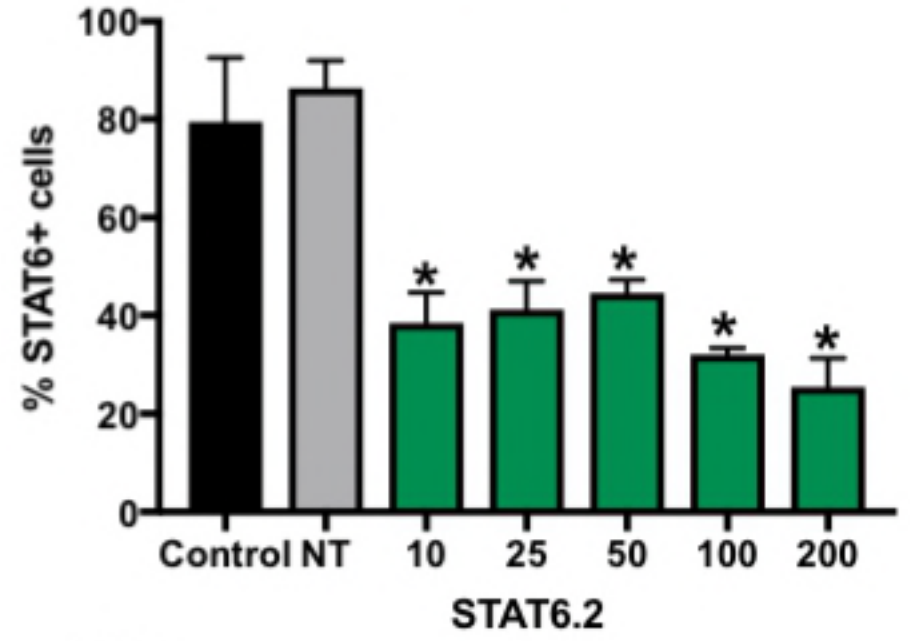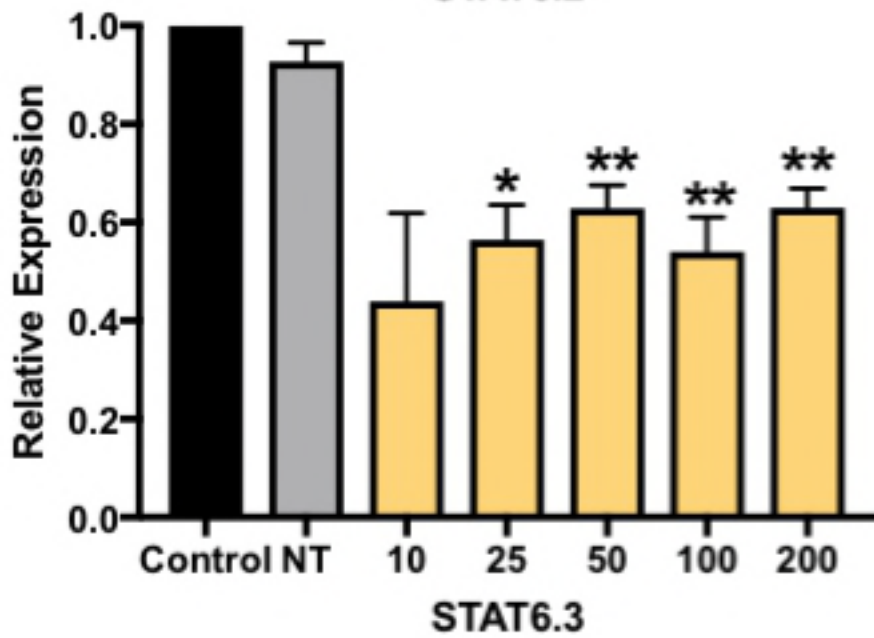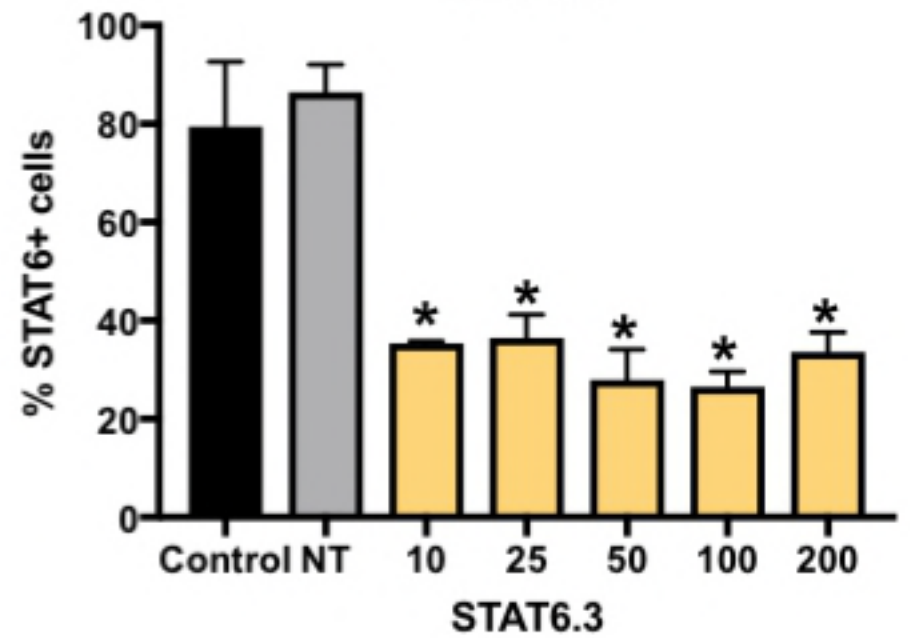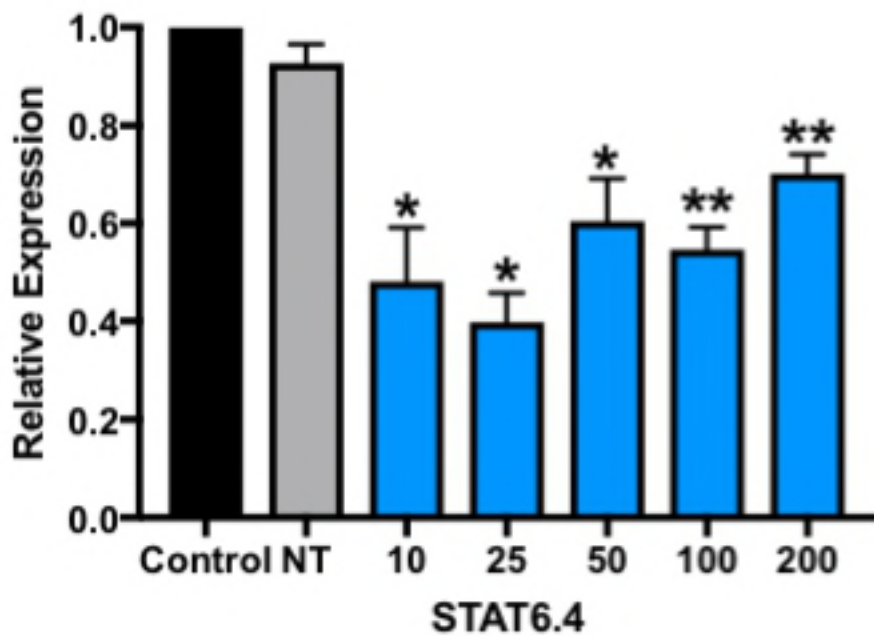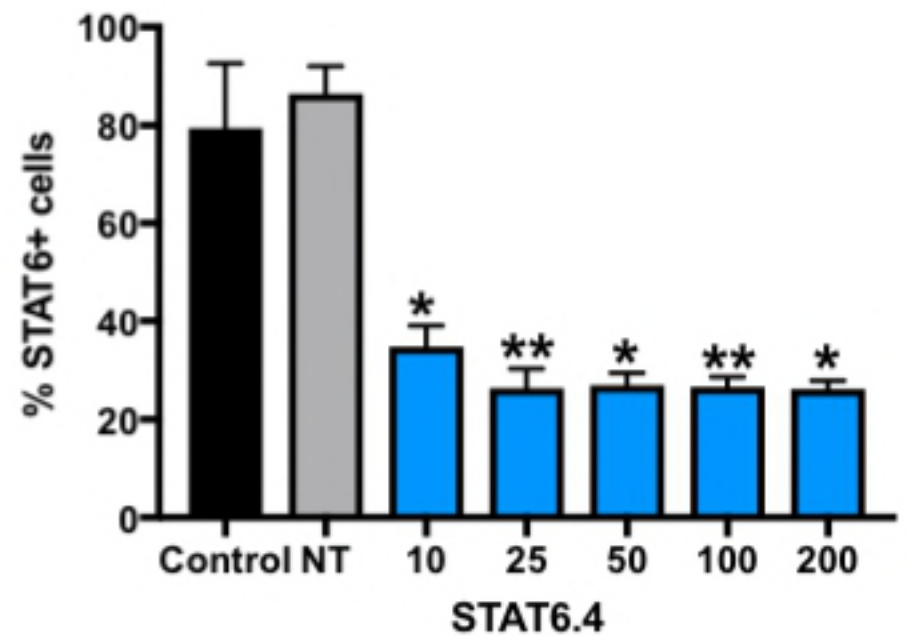

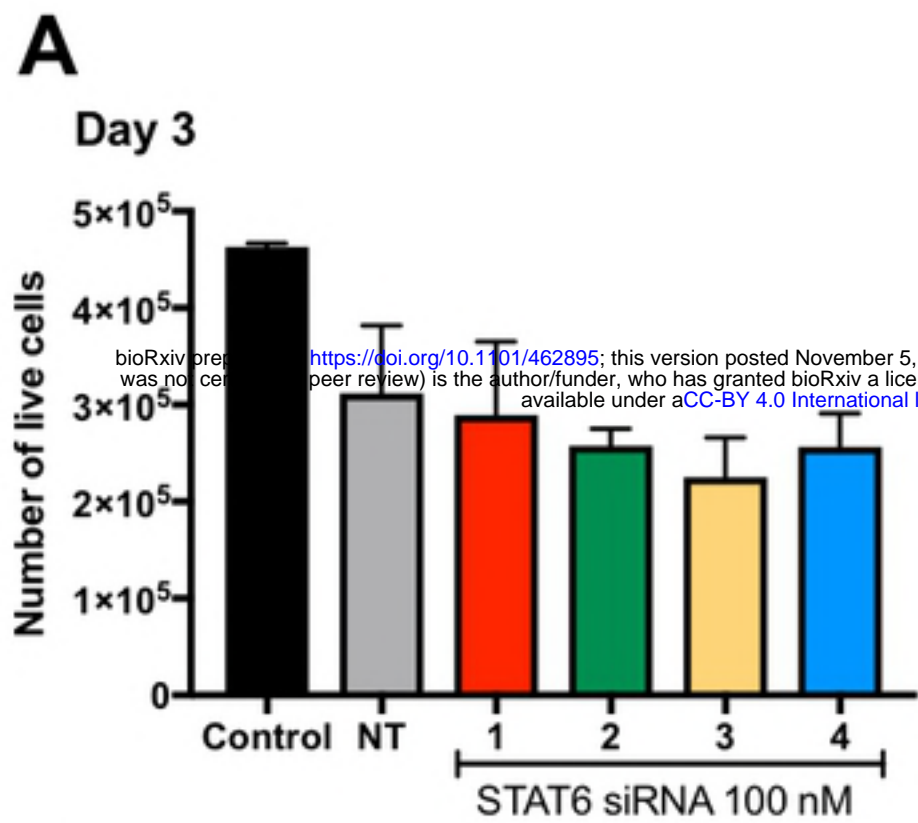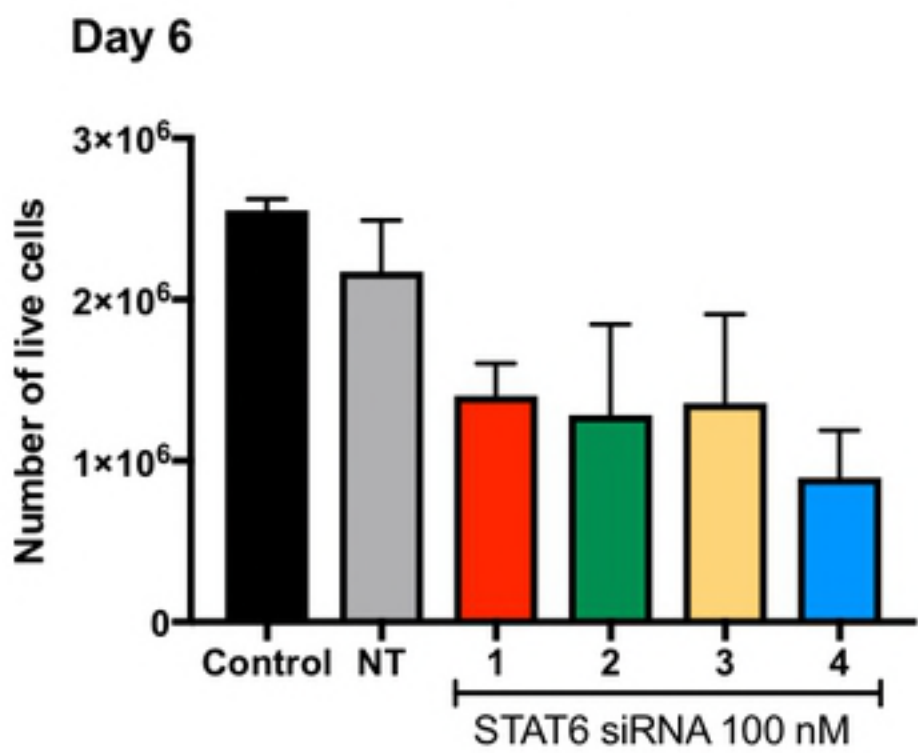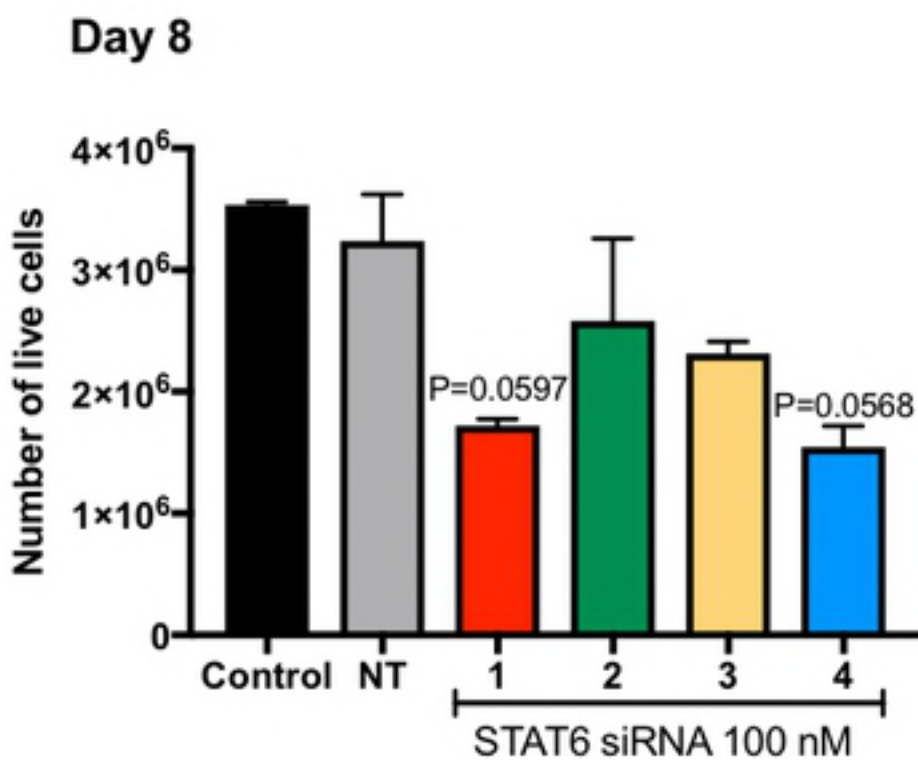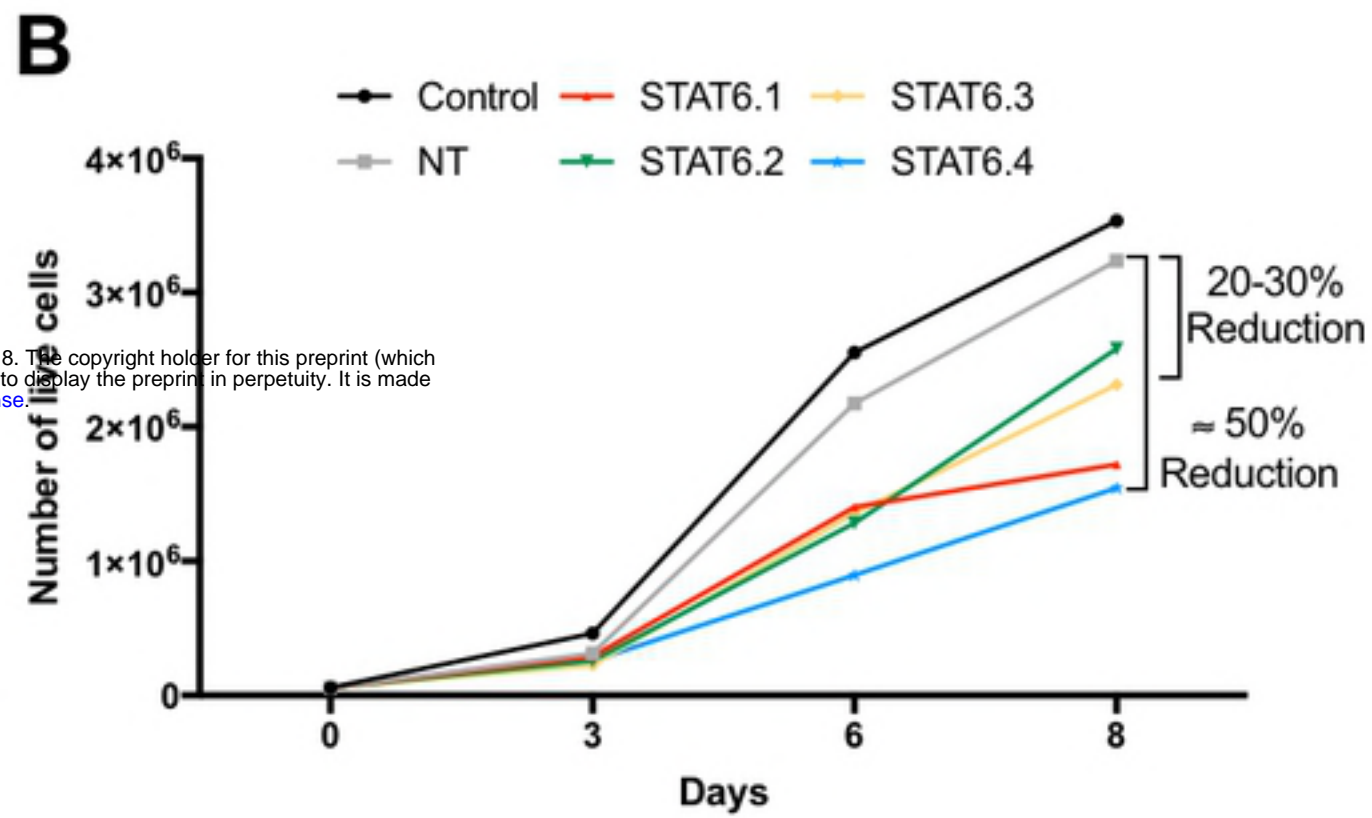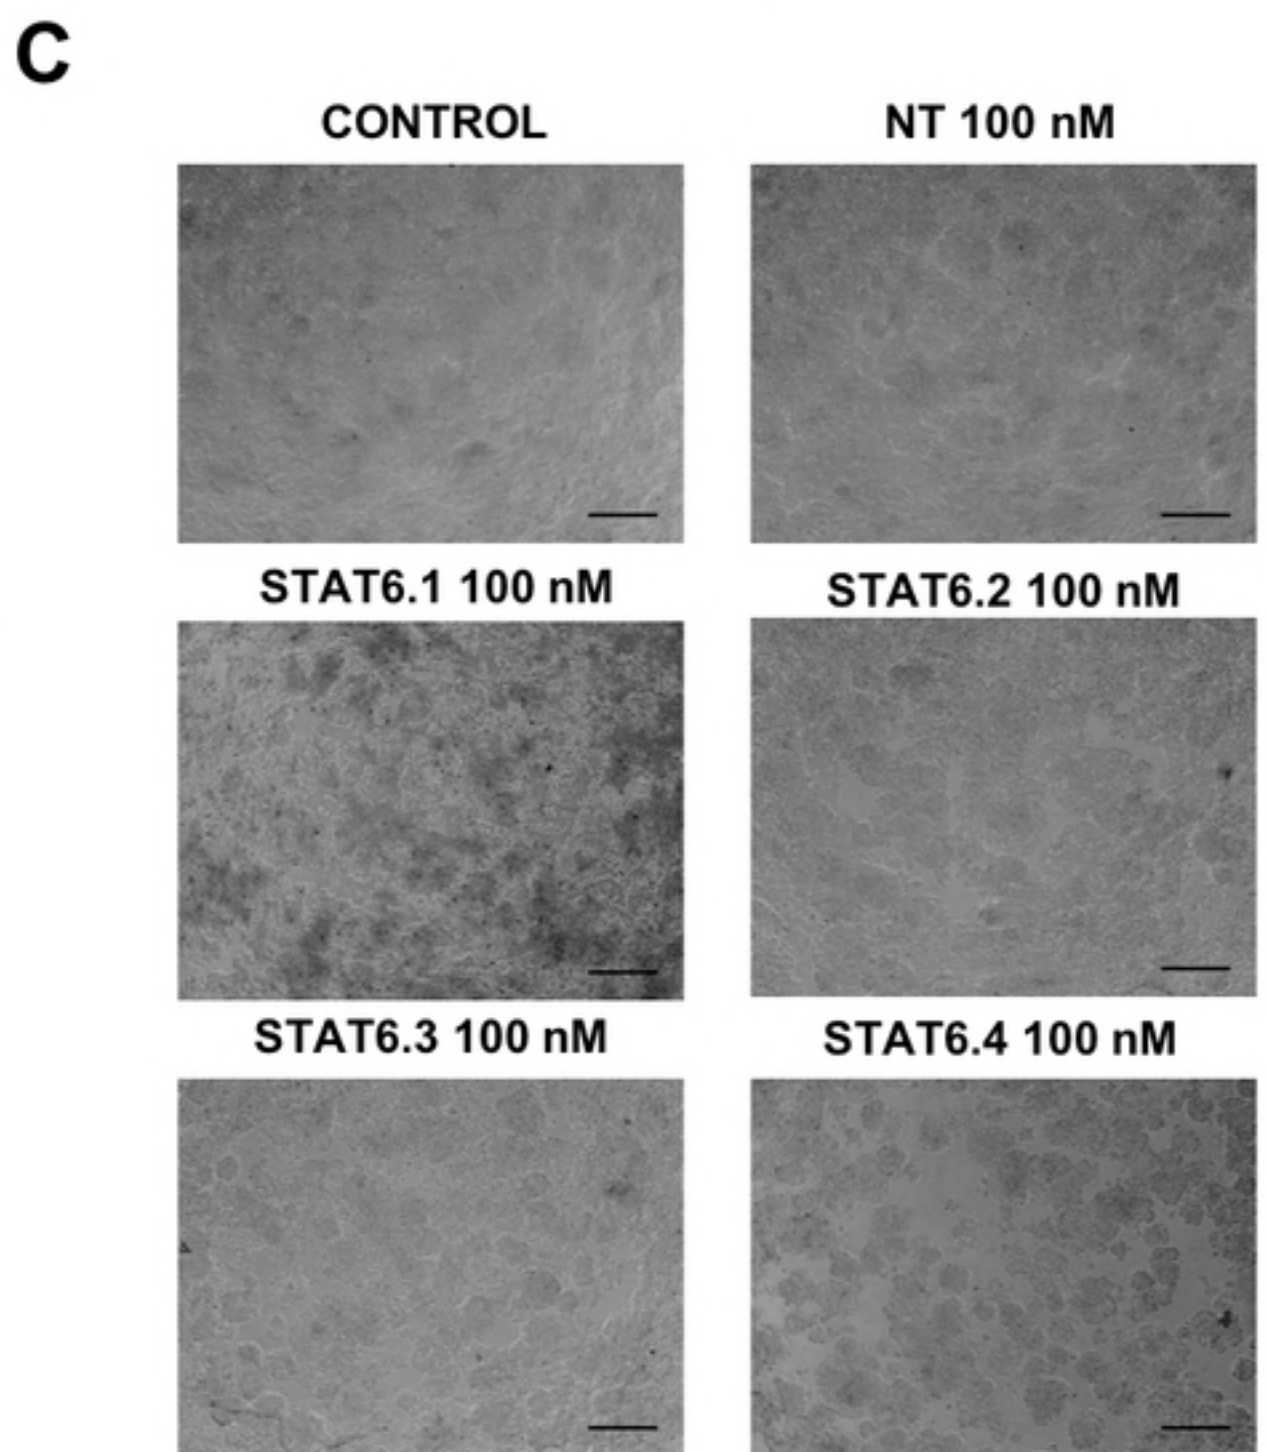

Source: https://www.biorxiv.org/content/10.1101/462895v1.full.pdf
